# Supplementary material for: Membrane protein-regulated networks across human cancers
Source: PubMed Central journal article supplement (PMC6635409; doi:10.1038/s41467-019-10920-8), 2019-07-16
Supplement: 41467_2019_10920_MOESM11_ESM.pdf [file 41467_2019_10920_MOESM11_ESM.pdf]

# Membrane protein-regulated networks across human cancers

## Supplementary Data 8 - All plasmid sequences used in this study

PCDNA5 CHRNA9-CFP

PROMOTER

CHRNA9

Linker

CFP

GACGGATCGGGAGATCTCCCGATCCCCTATGGTGCACTCTCAGTACAATCT  
GCTCTGATGCCGCATAGTTAAGCCAGTATCTGCTCCCTGCTTGTGTGTTGGA  
GGTCGCTGAGTAGTGCGCGAGCAAATTTAAGCTACAACAAGGCAAGGCT  
TGACCGACAATTGCATGAAGAATCTGCTTAGGGTTAGGCGTTTTGCGCTGC  
TTCGCGATGTACGGGCCAGATATACGCGTTGACATTGATTATTGACTAGTTAT  
TAATAGTAATCAATTACGGGGTCATTAGTTCATAGCCCATATATGGAGTTCCG  
CGTTACATAACTTACGGTAAATGGCCCGCCTGGCTGACCGCCCAACGACCC  
CCGCCATTGACGTCAATAATGACGTATGTTCCCATAGTAACGCCAATAGGG  
ACTTTCATTGACGTCAATGGGTGGAGTATTTACGGTAAACTGCCCACTTGG  
CAGTACATCAAGTGTATCATATGCCAAGTACGCCCCCTATTGACGTCAATGA  
CGGTAAATGGCCCGCCTGGCATTATGCCCAGTACATGACCTTATGGGACTTT  
CCTACTTGGCAGTACATCTACGTATTAGTCATCGCTATTACCATGGTGATGCG  
GTTTTGGCAGTACATCAATGGGCGTGGATAGCGGTTTGACTCACGGGGATT  
TCCAAGTCTCCACCCATTGACGTCAATGGGAGTTTGTGTTTTGGCACCAAAA  
TCAACGGGACTTTCCAAAATGTCGTAACAACCTCCGCCCCATTGACGCAAT  
GGGCGGTAGGCGTGTACGGTGGGAGGTCTATATAAGCAGAGCTCTCCCTAT  
CAGTGATAGAGATCTCCCTATCAGTGATAGAGATCGTCGACGAGCTCGTTTA  
GTGAACCGTCAGATCGCCTGGAGACGCCATCCACGCTGTTTTGACCTCCAT  
AGAAGACACCGGGACCGATCCAGCCTCCGGACTCTAGCGTTTAAACTTAA  
GCTTATGAACTGGTCCCATTCCTGCATCTCCTTTTGCTGGATCTACTTTGCTG  
CTTCCAGACTGAGAGCTGCAGAGACGGCAGATGGAAAATATGCTCAGAAG  
TTGTTTAATGACCTTTTTGAAGATTATTCTAATGCTCTTCGTCCAGTGGAAG  
ATACAGATAAAGTCCTGAATGTGACCCTGCAGATTACGCTCTCTCAGATTAA  
GGATATGGATGAAAGAAACCAAATTCTGACTGCTTATTTGTGGATCCGCCA  
AATCTGGCACGATGCCTATCTCACGTGGGACCGAGATCAGTACGATGGCCT  
AGACTCCATCAGGATCCCCAGTGACCTCGTGTGGAGGCCAGACATCGTCTT

ATATAACAAGGCTGATGATGAATCTTCAGAGCCTGTGAACACCAATGTGGT  
CCTGCGGTATGATGGGCTGATCACCTGGGATGCACCGGCCATCACAAAAG  
CTCCTGTGTGGTGGATGTCACCTACTTCCCTTTTGACAACCAGCAGTGCAA  
CCTGACTTTTGGTTCCTGGACCTACAATGGCAATCAGGTGGACATATTCAAC  
GCCTTGACAGCGGAGATCTCTGACTTCATTGAAGATGTGGAATGGGAG  
GTCCATGGCATGCCCGCTGTGAAGAATGTGATCTCCTATGGCTGCTGCTCTG  
AGCCTTACCCGGATGTCACATTCACCCTCCTTCTGAAGAGGAGGTCCCTCGT  
TCTATATCGTCAACCTCCTCATCCCATGCGTCCTCATATCTTTTCTGGCTCCT  
CTGAGTTTTTATCTCCCAGCAGCCTCCGGAGAAAAGGTCTCCCTGGGAGTG  
ACCATCCTGTTGGCCATGACTGTATTTAGCTAATGGTGGCAGAAATCATGC  
CGGCCTCAGAAAATGTGCCCCTGATAGGTAAATACTACATAGCCACGATGG  
CCCTGATCACAGCCTCCACTGCGTTGACCATCATGGTGTGATGAATATCCACTT  
CTGTGGGGCCGAGGCCCGGCGGTGCCACACTGGGCCAGGGTGGTCATCC  
TGAAATACATGTCCAGGGTCTTGTTTGTCTATGATGTGGGTGAAAGCTGCCT  
CAGCCCGCACACAGTAGAGAGCGGGACCACCTCACGAAAGTTTATAGCA  
AACTCCCAGAGTCTAACCTGAAAGCAGCCAGGAACAAAGACCTTTCCAGA  
AAGAAGGACATGAACAAACGCTTAAAGAACGACCTGGGCTGCCAGGGTA  
AGAACCCTCAGGAGGCCGAGAGTTACTGTGCACAGTACAAAGTGCTGACG  
AGGAATATTGAGTACATCGCCAAGTGCCTCAAAGACCACAAGGCCACCAG  
TTCCAAGGGGAGTGAATGGAAGAAGGTGGCGAAAGTCATAGACCGATTCT  
TCATGTGGATTTTTTTCATTATGGTGTGTTGTGATGACTATTTTGATCATAGCA  
AGAGCGGATGGTACCGAGCTCGGATCCACTAGTCCAGTGTGGTGGAAATTCT  
GCAGATATCCAGCACAGTGGCGGCCGCTCGAGGATGGCCCTGTCCAACAA  
GTTTCATCGGCGACGACATGAAGATGACCTACCACATGGACGGCTGCGTGAA  
CGGCCACTACTTCACCGTGAAGGGCGAGGGCAGCGGCAAGCCCTACGAGG  
GCACCCAGACCTCCACCTTCAAGGTGACCATGGCCAACGGCGGCCCCCTG  
GCCTTCTCCTTCGACATCCTGTCCACCGTGTTCATGTACGGCAACCGCTGCT  
TCACCGCCTACCCACCAGCATGCCCGACTACTTCAAGCAGGCCTTCCCCG  
ACGGCATGTCCTACGAGAGAACCTTACCTACGAGGACGGCGGGCGTGGCC  
ACCGCCAGCTGGGAGATCAGCCTGAAGGGCAACTGCTTCGAGCACAAGTC  
CACCTTCCACGGCGTGAACCTTCCCCGCCGACGGCCCCGTGATGGCCAAGA  
AGACCACCGGCTGGGACCCCTCCTTCGAGAAGATGACCGTGTGCGACGGC  
ATCTTGAAGGGCGACGTGACCGCCTTCTGATGCTGCAGGGCGGGCGGCAA  
CTACAGATGCCAGTTCCACACCTCCTACAAGACCAAGAAGCCCGTGACCAT  
GCCCCCAACCACGTGGTGGAGCACCGCATCGCCAGAACCGACCTGGACA  
AGGGCGGCAACAGCGTGCAGCTGACCGAGCACGCCGTGGCCCACATCACC  
TCCGTGGTGCCTTCTAACTCTAGAGGGCCCGTTTAAACCCGCTGATCAGC  
CTCGACTGTGCCTTCTAGTTGCCAGCCATCTGTTGTTTGGCCCTCCCCCGTG

CCTTCCTTGACCCTGGAAGGTGCCACTCCCCTGTCCTTTCTAATAAAAATG  
AGGAAATTGCATCGCATTGTCTGAGTAGGTGTCATTCTATTCTGGGGGGTGG  
GGTGGGGCAGGACAGCAAGGGGGAGGATTGGGAAGACAATAGCAGGCAT  
GCTGGGGATGCGGTGGGCTCTATGGCTTCTGAGGGCGGAAAGAACCAGCTG  
GGGCTCTAGGGGGTATCCCCACGCGCCCTGTAGCGGCGCATTAAAGCGCGGC  
GGGTGTGGTGGTTACGCGCAGCGTGACCGCTACACTTGCCAGCGCCCTAGC  
GCCCCGCTCCTTTCGCTTCTTCCCTTCCTTCTCGCCACGTTCCGCCGGCTTT  
CCCCGTC AAGCTCTAAATCGGGGGCTCCCTTTAGGGTTCCGATTTAGTGCTT  
TACGGCACCTCGACCCCAAAAACTTGATTAGGGTGATGGTTCACGTAGTG  
GGCCATCGCCCTGATAGACGGTTTTTTCGCCCTTGACGTTGGAGTCCACGT  
TCTTTAATAGTGGACTCTTGTTCCAAACACTGGAACAACACTCAACCCTATCTC  
GGTCTATTCTTTTGATTATAAGGGATTTTGCCGATTCGGCCTATTGGTTAA  
AAAATGAGCTGATTTAACAAAAATTAACGCGAATTAATTCTGTGGAATGTG  
TGTCAGTTAGGGTGTGGAAAGTCCCCAGGCTCCCCAGCAGGCAGAAGTAT  
GCAAAGCATGCATCTCAATTAGTCAGCAACCAGGTGTGGAAAGTCCCCAG  
GCTCCCCAGCAGGCAGAAGTATGCAAAGCATGCATCTCAATTAGTCAGCAA  
CCATAGTCCCGCCCCTAACTCCGCCATCCCGCCCCTAACTCCGCCAGTTC  
CGCCATTCTCCGCCCATGGCTGACTAATTTTTTTTATTTATGCAGAGGCCG  
AGGCCGCTCTGCCTCTGAGCTATTCCAGAAGTAGTGAGGAGGCTTTTTTG  
GAGGCCTAGGCTTTTGCAAAAAGCTCCCGGGAGCTTGTATATCCATTTTCG  
GATCTGATCAGCACGTGATGAAAAAGCCTGAACTCACCGCGACGTCTGTC  
GAGAAGTTTCTGATCGAAAAGTTCGACAGCGTCTCCGACCTGATGCAGCTC  
TCGGAGGGCGAAGAATCTCGTGCTTTCAGCTTCGATGTAGGAGGGCGTGG  
ATATGTCCTGCGGGTAAATAGCTGCGCCGATGGTTTCTACAAAGATCGTTAT  
GTTTATCGGCACTTTGCATCGGCCGCGCTCCCGATTCCGGAAGTGCTTGAC  
ATTGGGGAATTCAGCGAGAGCCTGACCTATTGCATCTCCCGCCGTGCACAG  
GGTGTACGTTGCAAGACCTGCCTGAAACCGAACTGCCCCGCTGTTCTGCA  
GCCGGTCGCGGAGGCCATGGATGCGATCGCTGCGGCCGATCTTAGCCAGAC  
GAGCGGGTTCGGCCATTCGGACCGCAAGGAATCGGTCAATACTACTACATG  
GCGTGATTTCATATGCGCGATTGCTGATCCCCATGTGTATCACTGGCAAAC  
GTGATGGACGACACCGTCAGTGCGTCCGTGCGCGCAGGCTCTCGATGAGCT  
GATGCTTTGGGCCGAGGACTGCCCCGAAGTCCGGCACCTCGTGACGCGG  
ATTCGGCTCCAACAATGTCCTGACGGACAATGGCCGCATAACAGCGGTCA  
TTGACTGGAGCGAGGCGATGTTTCGGGGATTCCCAATACGAGGTCGCCAAC  
ATCTTCTTCTGGAGGCCGTGGTTGGCTTGTATGGAGCAGCAGACGCGCTAC  
TTCGAGCGGAGGCATCCGGAGCTTGCAGGATCGCCGCGGCTCCGGGGCGTAT  
ATGCTCCGCATTGGTCTTGACCAACTCTATCAGAGCTTGGTTGACGGCAATT  
TCGATGATGCAGCTTGGGCGCAGGGTTCGATGCGACGCAATCGTCCGATCCG

GAGCCGGGACTGTCGGGGCGTACACAAATCGCCCCGAGAAGCGCGGGCCGTC  
TGGACCGATGGCTGTGTAGAAAGTACTCGCCGATAGTGGAAACCGACGCCCC  
AGCACTCGTCCGAGGGCAAAGGAATAGCACGTGCTACGAGATTTCGATTCC  
ACCGCCGCCTTCTATGAAAGGTTGGGCTTCGGAATCGTTTTCCGGGACGCC  
GGCTGGATGATCCTCCAGCGCGGGGATCTCATGCTGGAGTTCTTCGCCCAC  
CCCAACTTGTTTATTGCAGCTTATAATGGTTACAAATAAAGCAATAGCATCA  
CAAATTCACAAATAAAGCATTTTTTTCACTGCATTCTAGTTGTGGTTTGTG  
CAAATCATCAATGTATCTTATCATGTCTGTATAACCGTCGACCTCTAGCTAGA  
GCTTGCGTAATCATGGTCATAGCTGTTTCCTGTGTGAAATTGTTATCCGCT  
CACAATTCCACACAACATACGAGCCGGAAGCATAAAGTGTAAGCCTGGG  
GTGCCTAATGAGTGAGCTAACTCACATTAATTGCGTTGCGCTCACTGCCCCG  
TTCCAGTCGGGAAACCTGTCGTGCCAGCTGCATTAATGAATCGGCCAACG  
CGCGGGGAGAGGGCGGTTTTCGTATTGGGCGCTCTTCCGCTTCCCTCGCTCAC  
TGAATCGCTGCGCTCGGTCGTTCCGCTGCGGGGAGCGGTATCAGCTCACTC  
AAAGGCGGTAATACGGTTATCCACAGAATCAGGGGATAACGCAGGAAAGA  
ACATGTGAGCAAAAGGCCAGCAAAAGGCCAGGAACCGTAAAAAGGCCGC  
GTTGCTGGCGTTTTTCCATAGGCTCCGCCCCCTGACGAGCATCACAAAA  
TCGACGCTCAAGTCAGAGGTGGCGAAACCCGACAGGACTATAAAGATACC  
AGGCGTTTTCCCTGGAAGCTCCCTCGTGCGCTCTCCTGTTCCGACCCTGC  
CGCTTACCGGATACCTGTCCGCCTTTCTCCCTTCGGGAAGCGTGGCGCTTTC  
TCATAGCTCACGCTGTAGGTATCTCAGTTCGGTGTAGGTGCTTCGCTCCAAG  
CTGGGCTGTGTGCACGAACCCCCGTTACGCCGACCGCTGCGCCTTATCC  
GGTAACTATCGTCTTGAGTCCAACCCGGTAAGACACGACTTATCGCCACTG  
GCAGCAGCCACTGGTAACAGGATTAGCAGAGCGAGGTATGTAGGCGGTGC  
TACAGAGTTCTTGAAGTGGTGGCCTAACTACGGCTACACTAGAAGAACAGT  
ATTTGGTATCTGCGCTCTGCTGAAGCCAGTTACCTTCGGAAAAAGAGTTGG  
TAGCTCTTGATCCGGCAAACAAACCACCGCTGGTAGCGGTTGGTTTTTTGT  
TTGCAAGCAGCAGATTACGCGCAGAAAAAAGGATCTCAAGAAGATCCTT  
TGATCTTTTCTACGGGTCTGACGCTCAGTGGAACGAAAACCTCACGTTAAG  
GGATTTTGGTCATGAGATTATCAAAAAGGATCTTCACCTAGATCCTTTTAAA  
TTAAAAATGAAGTTTTTAAATCAATCTAAAGTATATATGAGTAAACTTGGTCT  
GACAGTTACCAATGCTTAATCAGTGAGGCACCTATCTCAGCGATCTGTCTAT  
TTCGTTTCATCCATAGTTGCCTGACTCCCCGTCGTGTAGATAACTACGATACG  
GGAGGGCTTACCATCTGGCCCCAGTGCTGCAATGATACCGCGAGACCCACG  
CTCACCGGCTCCAGATTTATCAGCAATAAACCAGCCAGCCGGAAGGGCCG  
AGCGCAGAAGTGGTCCCTGCAACTTTATCCGCCTCCATCCAGTCTATTAATTG  
TTGCCGGAAGCTAGAGTAAGTAGTTCGCCAGTTAATAGTTTGCGCAACGT  
TGTTGCCATTGCTACAGGCATCGTGGTGTACGCTCGTCGTTTTGGTATGGCT

TCATTCAGCTCCGGTTCCCAACGATCAAGGCGAGTTACATGATCCCCCATGT  
TGTGCAAAAAGCGGTTAGCTCCTTCGGTCCTCCGATCGTTGTCAGAAGTA  
AGTTGGCCGCAGTGTTATCACTCATGGTTATGGCAGCACTGCATAATTCTCT  
TACTGTCATGCCATCCGTAAGATGCTTTTCTGTGACTGGTGAGTACTCAACC  
AAGTCATTCTGAGAATAGTGTATGCGGCGACCGAGTTGCTCTTGCCCCGGCG  
TCAATACGGGATAATACCGCGCCACATAGCAGAACTTTAAAAGTGCTCATC  
ATTGGAAAACGTTCTTCGGGGCGAAAACCTCAAGGATCTTACCGCTGTTG  
AGATCCAGTTCGATGTAACCCACTCGTGCACCCAAGTATCTTCAGCATCTT  
TTACTTTCACCAGCGTTTCTGGGTGAGCAAAAACAGGAAGGCAAAATGCC  
GCAAAAAGGGAATAAGGGCGACACGGAAATGTTGAATACTCATACTCTTC  
CTTTTCAATATTATTGAAGCATTATCAGGGTTATTGTCTCATGAGCGGATA  
CATATTTGAATGTATTTAGAAAAATAAACAAATAGGGGTTCCGCGCACATTT  
CCCCGAAAAGTGCCACCTGACGTC

PCDNA5 ERBB2-YFP

PROMOTER

ERBB2

Linker

YFP

GACGGATCGGGAGATCTCCCGATCCCCTATGGTGC ACTCTCAGTACAATCT  
GCTCTGATGCCGCATAGTTAAGCCAGTATCTGCTCCCTGCTTGTGTGTTGGA  
GGTCGCTGAGTAGTGC GCGAGCAAATTTAAGCTACAACAAGGCAAGGCT  
TGACCGACAATTGCATGAAGAATCTGCTTAGGGTTAGGCGTTTTGCGCTGC  
TTCGCGATGTACGGGCCAGATATACGCGTTGACATTGATTATTGACTAGTTAT  
TAATAGTAATCAATTACGGGGTCATTAGTTCATAGCCCATATATGGAGTTCCG  
CGTTACATAACTTACGGTAAATGGCCCGCCTGGCTGACCGCCCAACGACCC  
CCGCCATTGACGTCAATAATGACGTATGTTCCCATAGTAACGCCAATAGGG  
ACTTTCATTGACGTCAATGGGTGGAGTATTTACGGTAAACTGCCCACTTGG  
CAGTACATCAAGTGTATCATATGCCAAGTACGCCCCCTATTGACGTCAATGA  
CGGTAAATGGCCCGCCTGGCATTATGCCCAGTACATGACCTTATGGGACTTT  
CCTACTTGGCAGTACATCTACGTATTAGTCATCGCTATTACCATGGTGATGCG  
GTTTTGGCAGTACATCAATGGGCGTGGATAGCGGTTTGACTCACGGGGATT  
TCCAAGTCTCCACCCCATGACGTCAATGGGAGTTTGTTTTGGCACCAAAA  
TCAACGGGACTTTCCAAAATGTCGTAACA ACTCCGCCCCATTGACGCAAAT  
GGGCGGTAGGCGTGTACGGTGGGAGGTCTATATAAGCAGAGCTCTCCCTAT  
CAGTGATAGAGATCTCCCTATCAGTGATAGAGATCGTCGACGAGCTCGTTTA  
GTGAACCGTCAGATCGCCTGGAGACGCCATCCACGCTGTTTTGACCTCCAT  
AGAAGACACCGGGACCGATCCAGCCTCCGGACTCTAGCGTTTAAACTTAA  
GCTTATGGAGCTGGCGGCCTTGTGCCGCTGGGGGCTCCTCCTCGCCCTCTT  
GCCCCCGGAGCCGCGAGCACCCAAGTGTGCACCGGCACAGACATGAAGC  
TGCGGCTCCCTGCCAGTCCCGAGACCCACCTGGACATGCTCCGCCACCTCT  
ACCAGGGCTGCCAGGTGGTGCAGGGAAACCTGGA ACTCACCTACCTGCC  
ACCAATGCCAGCCTGTCCTTCCTGCAGGATATCCAGGAGGTGCAGGGCTAC  
GTGCTCATCGCTCACAACCAAGTGAGGCAGGTCCC ACTGCAGAGGCTGCG  
GATTGTGCGAGGCACCCAGCTCTTTGAGGACA ACTATGCCCTGGCCGTGCT  
AGACAATGGAGACCCGCTGAACAATACCACCCCTGTCACAGGGGCCTCCC  
CAGGAGGCCTGCGGGAGCTGCAGCTTCGAAGCCTCACAGAGATCTTGAAA  
GGAGGGGTCTTGATCCAGCGGAACCCCACTCTGCTACCAGGACACGAT  
TTTGTGGAAGGACATCTTCCACAAGAACAACCAGCTGGCTCTCACACTGAT  
AGACACCAACCGCTCTCGGGCCTGCCACCCCTGTTCTCCGATGTGTAAGGG  
CTCCCGCTGCTGGGGAGAGAGTTCTGAGGATTGTCAGAGCCTGACGCGCA  
CTGTCTGTGCCGGTGGCTGTGCCCGCTGCAAGGGGCCACTGCCCACTGAC

TGCTGCCATGAGCAGTGTGCTGCCGGCTGCACGGGCCCAAGCACTCTGA  
CTGCCTGGCCTGCCTCCACTTCAACCACAGTGGCATCTGTGAGCTGCACTG  
CCCAGCCCTGGTCACCTACAACACAGACACGTTTGAGTCCATGCCCAATCC  
CGAGGGCCGGTATACATTCCGGCGCCAGCTGTGTGACTGCCTGTCCCTACAA  
CTACCTTTCTACGGACGTGGGATCCTGCACCCTCGTCTGCCCCCTGCACAA  
CCAAGAGGTGACAGCAGAGGATGGAACACAGCGGTGTGAGAAGTGCAGC  
AAGCCCTGTGCCCGAGTGTGCTATGGTCTGGGCATGGAGCACTTGCGAGA  
GGTGAGGGCAGTTACCAGTGCCAATATCCAGGAGTTTGCTGGCTGCAAGA  
AGATCTTTGGGAGCCTGGCATTCTGCCGGAGAGCTTTGATGGGGACCCAG  
CCTCCAACACTGCCCCGCTCCAGCCAGAGCAGCTCCAAGTGTTGAGACT  
CTGGAAGAGATCACAGGTTACCTATACATCTCAGCATGGCCGGACAGCCTG  
CCTGACCTCAGCGTCTTCCAGAACCTGCAAGTAATCCGGGGACGAATTCTG  
CACAATGGCGCCTACTCGCTGACCCTGCAAGGGCTGGGCATCAGCTGGCTG  
GGGCTGCGCTCACTGAGGGAAGTGGGCAGTGGACTGGCCCTCATCCACCA  
TAACACCCACCTCTGCTTCGTGCACACGGTGCCTGGGACCAGCTCTTTCG  
GAACCCGCACCAAGCTCTGCTCCACACTGCCAACCGGCCAGAGGACGAGT  
GTGTGGGCGAGGGCCTGGCCTGCCACCAGCTGTGCGCCCGAGGGCACTGC  
TGGGGTCCAGGGCCACCCAGTGTGTCAACTGCAGCCAGTTCCTTCGGGG  
CCAGGAGTGC GTGGAGGAATGCCGAGTACTGCAGGGGCTCCCCAGGGAGT  
ATGTGAATGCCAGGCACTGTTTGCCGTGCCACCCTGAGTGTGAGCCCCAGA  
ATGGCTCAGTGACCTGTTTTGGACCGGAGGCTGACCAGTGTGTGGCCTGTG  
CCCCTATAAGGACCCTCCCTTCTGCGTGGCCCGCTGCCCCAGCGGTGTGA  
AACCTGACCTCTCCTACATGCCATCTGGAAGTTTCCAGATGAGGAGGGCG  
CATGCCAGCCTTGCCCCATCAACTGCACCCACTCCTGTGTGGACCTGGATG  
ACAAGGGCTGCCCCGCCGAGCAGAGAGCCAGCCCTCTGACGTCCATCATC  
TCTGCGGTGGTTGGCATTCTGCTGGTCGTGGTCTTGGGGGTGGTCTTTGGG  
ATCCTCATCAAGCGACGGCAGCAGAAGATCCGGAAGTACACGATGCGGAG  
ACTGCTGCAGGAAACGGAGCTGGTGGAGCCGCTGACACCTAGCGGAGCG  
ATGCCAACCCAGGCGCAGATGCGGATCCTGAAAGAGACGGAGCTGAGGAA  
GGTGAAGGTGCTTGGATCTGGCGCTTTTGGCACAGTCTACAAGGGCATCTG  
GATCCCTGATGGGGAGAATGTGAAAATTCCAGTGGCCATCAAAGTGTTGAG  
GGAAAACACATCCCCAAAGCCAACAAAGAAATCTTAGACGAAGCATAACG  
TGATGGCTGGTGTGGGCTCCCCATATGTCTCCCGCCTTCTGGGCATCTGCCT  
GACATCCACGGTGCAGCTGGTGACACAGCTTATGCCCTATGGCTGCCTCTT  
AGACCATGTCCGGGAAAACCGCGGACGCCTGGGCTCCCAGGACCTGCTGA  
ACTGGTGTATGCAGATTGCCAAGGGGATGAGCTACCTGGAGGATGTGCGGC  
TCGTACACAGGGACTTGGCCGCTCGGAACGTGCTGGTCAAGAGTCCCAAC  
CATGTCAA AATTACAGACTTCGGGCTGGCTCGGCTGCTGGACATTGACGAG

ACAGAGTACCATGCAGATGGGGGCAAGGTGCCCATCAAGTGGATGGCGCT  
GGAGTCCATTCTCCGCCGGCGTTACCCACCAGAGTGATGTGTGGAGTTA  
TGGTGTGACTGTGTGGGAGCTGATGACTTTTGGGGCCAAACCTTACGATGG  
GATCCCAGCCCCGGGAGATCCCTGACCTGCTGGAAAAGGGGGAGCGGCTGC  
CCCAGCCCCCATCTGCACCATGATGTCTACATGATCATGGTCAAATGTTG  
GATGATTGACTCTGAATGTCGGCCAAGATTCCGGGAGTTGGTGTCTGAATT  
CTCCCGCATGGCCAGGGACCCCCAGCGCTTTGTGGTCATCCAGAATGAGGA  
CTTGGGCCAGCCAGTCCCTTGACAGCACCTTCTACCGCTCACTGCTGGA  
GGACGATGACATGGGGGACCTGGTGGATGCTGAGGAGTATCTGGTACCCCA  
GCAGGGCTTCTTCTGTCCAGACCCTGCCCGGGCGCTGGGGGCATGGTCC  
ACCACAGGCACCGCAGCTCATCTACCAGGAGTGGCGGTGGGGACCTGACA  
CTAGGGCTGGAGCCCTCTGAAGAGGAGGCCCCCAGGTCTCCACTGGCACC  
CTCCGAAGGGGCTGGCTCCGATGTATTTGATGGTGACCTGGGAATGGGGGC  
AGCCAAGGGGCTGCAAAGCCTCCCCACACATGACCCCAGCCCTCTACAGC  
GGTACAGTGAGGACCCACAGTACCCTGCCCTCTGAGACTGATGGCTACG  
TTGCCCCCTGACCTGCAGCCCCAGCCTGAATATGTGAACCAGCCAGATG  
TTCGGCCCCAGCCCCCTTCGCCCCGAGAGGGCCCTCTGCCTGCTGCCCGAC  
CTGCTGGTGCCACTCTGGAAAGGCCCAAGACTCTCTCCCCAGGGAAGAAT  
GGGGTCGTCAAAGACGTTTTTGCCTTTGGGGGTGCCGTGGAGAACCCCGA  
GTACTTGACACCCAGGGAGGAGCTGCCCTCAGCCCCACCCTCCTCCTGC  
CTTCAGCCCAGCCTTCGACAACCTCTATTACTGGGACCAGGACCCACCAGA  
GCGGGGGGCTCCACCCAGCACCTTCAAAGGGACACCTACGGCAGAGAACC  
CAGAGTACCTGGGTCTGGACGTGCCAGTGGCAGCAGCAGGGCGGCGCTCG  
AGGATGGCCCACAGCAAGCACGGCCTGAAGGAGGAGATGACCATGAAGTA  
CCACATGGAGGGCTGCGTGAACGGCCACAAGTTCGTGATCACCGGCGAGG  
GCATCGGCTACCCCTTCAAGGGCAAGCAGACCATCAACCTGTGCGTGATCG  
AGGGCGGCCCCCTGCCCTTCAGCGAGGACATCCTGAGCGCCGGCTTCAAG  
TACGGCGACCGGATCTTCACCGAGTACCCCCAGGACATCGTGGACTACTTC  
AAGAACAGCTGCCCCGCCGGCTACACCTGGGGCCGGAGCTTCTGTTCGA  
GGACGGCGCCGTGTGCATCTGTAACGTGGACATCACCGTGAGCGTGAAGG  
AGAACTGCATCTACCACAAGAGCATCTTCAACGGCGTGAACTTCCCCGCCG  
ACGGCCCCGTGATGAAGAAGATGACCACCAACTGGGAGGCCAGCTGCGAG  
AAGATCATGCCGTGCCTAAGCAGGGCATCCTGAAGGGCGACGTGAGCAT  
GTACCTGCTGCTGAAGGACGGCGGCCGGTACCGGTGCCAGTTCGACACCG  
TGTACAAGGCCAAGAGCGTGCCAGCAAGATGCCCGAGTGGCACTTCATC  
CAGCACAAGCTGCTGCGGGAGGACCGGAGCGACGCCAAGAACCAGAAGT  
GGCAGCTGACCGAGCACGCCATCGCCTTCCCCAGCGCCCTGGCCTAAGTCT  
AGAGGGCCCCGTTTAAACCCGCTGATCAGCCTCGACTGTGCCTTCTAGTTGC



CAGCCATCTGTTGTTTGCCCCCTCCCCCGTGCCTTCCTTGACCCTGGAAGGT  
GCCACTCCCCTGTCCTTTCCTAATAAAATGAGGAAATTGCATCGCATTGTC  
TGAGTAGGTGTCATTCTATTCTGGGGGGTGGGGTGGGGCAGGACAGCAAG  
GGGGAGGATTGGGAAGACAATAGCAGGCATGCTGGGGATGCGGTGGGCTC  
TATGGCTTCTGAGGCGGAAAGAACCAGCTGGGGCTCTAGGGGGTATCCCCA  
CGCGCCCTGTAGCGGCGCATTAAAGCGCGGGCGGGTGTGGTGGTTACGCGCA  
GCGTGACCGCTACACTTGCCAGCGCCCTAGCGCCCCTCCTTTCGCTTTCT  
TCCCTTCCTTTCTCGCCACGTTTCGCCGGCTTTCCTCCCGTCAAGCTCTAAATCG  
GGGGCTCCCTTTAGGGTTCCGATTTAGTGCTTTACGGCACCTCGACCCCAA  
AAAATTGATTAGGGTGTGGTTCACGTAGTGGGCCATCGCCCTGATAGAC  
GGTTTTTCGCCCTTTGACGTTGGAGTCCACGTTCTTTAATAGTGGACTCTTG  
TTCCAAACTGGAACAACACTCAACCCTATCTCGGTCTATTCTTTTGATTTAT  
AAGGGATTTTGCCGATTTTCGGCCTATTGGTTAAAAAATGAGCTGATTAACA  
AAAATTTAACGGAATTAATTCTGTGGAATGTGTGTCAGTTAGGGTGTGGA  
AAGTCCCCAGGCTCCCCAGCAGGCAGAAGTATGCAAAGCATGCATCTCAAT  
TAGTCAGCAACCAGGTGTGGAAAGTCCCCAGGCTCCCCAGCAGGCAGAAG  
TATGCAAAGCATGCATCTCAATTAGTCAGCAACCATAGTCCCGCCCCTAACT  
CCGCCCATCCCGCCCCTAACTCCGCCAGTTCGCCCATTCTCCGCCCATG  
GCTGACTAATTTTTTTTATTTATGCAGAGGCCGAGGCCGCTCTGCCTCTGA  
GCTATTCCAGAAGTAGTGAGGAGGCTTTTTTGGAGGCCTAGGCTTTTGCAA  
AAAGCTCCCGGGAGCTTGTATATCCATTTTCGGATCTGATCAGCACGTGATG  
AAAAAGCCTGAACTCACCGCGACGTCTGTGCGAGAAGTTTCTGATCGAAAA  
GTTGACAGCGTCTCCGACCTGATGCAGCTCTCGGAGGGCGAAGAATCTC  
GTGCTTTCAGCTTCGATGTAGGAGGGCGTGGATATGTCCTGCGGGTAAATA  
GCTGCGCCGATGGTTTCTACAAAGATCGTTATGTTTATCGGCACTTTGCATC  
GGCCGCGCTCCCGATTCCGGAAGTGCTTGACATTGGGGAATTCAGCGAGA  
GCCTGACCTATTGCATCTCCCGCCGTGCACAGGGTGTACGTTGCAAGACC  
TGCTGAAACCGAACTGCCCGCTGTTCTGCAGCCGGTCGCGGAGGCCATG  
GATGCGATCGCTGCGGCCGATCTTAGCCAGACGAGCGGGTTCGGCCCATT  
GGACCGCAAGGAATCGGTCAATACTACATGGCGTGATTTTCATATGCGCG  
ATTGCTGATCCCCATGTGTATCACTGGCAAACGTGATGGACGACACCGTC  
AGTGCGTCCGTCGCGCAGGCTCTCGATGAGCTGATGCTTTGGGCCGAGGA  
CTGCCCCGAAGTCCGGCACCTCGTGCACGCGGATTTCCGGCTCCAACAATGT  
CCTGACGGACAATGGCCGCATAACAGCGGTCATTGACTGGAGCGAGGCGA  
TGTTCCGGGATTCCCAATACGAGGTCCGCAACATCTTCTTCTGGAGGCCGT  
GGTTGGCTTGTATGGAGCAGCAGACGCGCTACTTCGAGCGGAGGCATCCG  
GAGCTTGCAGGATCGCCGCGGCTCCGGGCGTATATGCTCCGCATTGGTCTT  
GACCAACTCTATCAGAGCTTGGTTGACGGCAATTCGATGATGCAGCTTGG

GCGCAGGGTCGATGCGACGCAATCGTCCGATCCGGAGCCGGGACTGTCGG  
GCGTACACAAATCGCCCGCAGAAGCGCGGCCGTCTGGACCGATGGCTGTG  
TAGAAGTACTCGCCGATAGTGGAAACCGACGCCCCAGCACTCGTCCGAGG  
GCAAAGGAATAGCACGTGCTACGAGATTTTCGATTCCACCGCCGCCTTCTAT  
GAAAGGTTGGGCTTCGGAATCGTTTTCCGGGACGCCGGCTGGATGATCCTC  
CAGCGCGGGGATCTCATGCTGGAGTTCTTCGCCCACCCCAACTTGTTTATTG  
CAGCTTATAATGGTTACAAATAAAGCAATAGCATCACAAATTCACAAATAA  
AGCATTTTTTTCACTGCATTCTAGTTGTGGTTTGTCCAAACTCATCAATGTAT  
CTTATCATGTCTGTATACCGTCGACCTCTAGCTAGAGCTTGGCGTAATCATG  
GTCATAGCTGTTTCCTGTGTGAAATTGTTATCCGCTCACAAATCCACACAAC  
ATACGAGCCGGAAGCATAAAGTGTAAGCCTGGGGTGCCTAATGAGTGAG  
CTAACTCACATTAATTGCGTTGCGCTCACTGCCCGCTTTCAGTCGGGAAA  
CCTGTCGTGCCAGCTGCATTAATGAATCGGCCAACGCGCGGGGAGAGGCG  
GTTTTCGTATTGGGCGCTCTTCCGCTTCCCTCGCTCACTGACTCGCTGCGCTC  
GGTCGTTCCGGCTGCGGCGAGCGGTATCAGCTCACTCAAAGGCGGTAATACG  
GTTATCCACAGAATCAGGGGATAACGCAGGAAAGAACATGTGAGCAAAAG  
GCCAGCAAAAGGCCAGGAACCGTAAAAAGGCCGCGTTGCTGGCGTTTTTC  
CATAGGCTCCGCCCCCTGACGAGCATCACAAAATCGACGCTCAAGTCAG  
AGGTGGCGAAACCCGACAGGACTATAAAGATACCAGGCGTTTCCCCCTGG  
AAGCTCCCTCGTGCGCTCTCCTGTTCCGACCCTGCCGCTTACCGGATACCT  
GTCCGCTTTTCTCCCTTCGGGAAGCGTGGCGCTTTCTCATAGCTCACGCTGT  
AGGTATCTCAGTTCGGTGTAGGTCGTTCCGCTCCAAGCTGGGCTGTGTGCAC  
GAACCCCCCGTTCAGCCCGACCGCTGCGCCTTATCCGGTAACTATCGTCTTG  
AGTCCAACCCGGTAAGACACGACTTATCGCCACTGGCAGCAGCCACTGGT  
AACAGGATTAGCAGAGCGAGGTATGTAGGCGGTGCTACAGAGTTCTTGAA  
GTGGTGGCCTAACTACGGCTACACTAGAAGAACAGTATTTGGTATCTGCGC  
TCTGCTGAAGCCAGTTACCTTCGGAAAAAGAGTTGGTAGCTCTTGATCCGG  
CAAACAACCACCGCTGGTAGCGGTTGGTTTTTTGTTTGCAAGCAGCAGAT  
TACGCGCAGAAAAAAAGGATCTCAAGAAGATCCTTTGATCTTTTCTACGGG  
GTCTGACGCTCAGTGGAACGAAAACCTCACGTTAAGGGATTTTGGTCATGAG  
ATTATCAAAAAGGATCTTCACCTAGATCCTTTTAAATTAATAAATGAAGTTTT  
AAATCAATCTAAAGTATATATGAGTAAACTTGGTCTGACAGTTACCAATGCT  
TAATCAGTGAGGCACCTATCTCAGCGATCTGTCTATTTTCGTTTCATCCATAGTT  
GCCTGACTCCCCGTCGTGTAGATAACTACGATACGGGAGGGCTTACCATCT  
GGCCCCAGTGCTGCAATGATACCGCGAGACCCACGCTCACCGGCTCCAGAT  
TTATCAGCAATAAACCAGCCAGCCGGAAGGGCCGAGCGCAGAAGTGGTCC  
TGCAACTTTATCCGCCTCCATCCAGTCTATTAATTGTTGCCGGGAAGCTAGA  
GTAAGTAGTTCGCCAGTTAATAGTTTTCGCAACGTTGTTGCCATTGCTACAG

GCATCGTGGTGTCACGCTCGTCGTTTGGTATGGCTTCATTCAGCTCCGGTTC  
CCAACGATCAAGGCGAGTTACATGATCCCCCATGTTGTGCAAAAAGCGGT  
TAGCTCCTTCGGTCCTCCGATCGTTGTCAGAAGTAAGTTGGCCGCAGTGTT  
ATCACTCATGGTTATGGCAGCACTGCATAATTCTCTTACTGTCATGCCATCCG  
TAAGATGCTTTTCTGTGACTGGTGAGTACTCAACCAAGTCATTCTGAGAATA  
GTGTATGCGGCGACCGAGTTGCTCTTGCCCGGCGTCAATACGGGATAATAC  
CGCGCCACATAGCAGAACTTTAAAAGTGCTCATCATTGGAAAACGTTCTTC  
GGGGCGAAAACCTCTCAAGGATCTTACCGCTGTTGAGATCCAGTTCGATGTA  
ACCCACTCGTGCACCCAACCTGATCTTCAGCATCTTTTACTTTCACCAGCGTT  
TCTGGGTGAGCAAAAACAGGAAGGCAAAAATGCCGCAAAAAGGGAATAA  
GGGCGACACGGAAATGTTGAATACTCATACTCTTCCTTTTCAATATTATTG  
AAGCATTATCAGGGTTATTGTCTCATGAGCGGATACATATTTGAATGTATTT  
AGAAAATAAACAAATAGGGGTCCGCGCACATTTCCCCGAAAAGTGCCA  
CCTGACGTC

PCDNA3.1 CHRNA9-Cluc

PROMOTER

Cluc

Linker

CHRNA9

GACGGATCGGGAGATCTCCCGATCCCCTATGGTGC ACTCTCAGTACAATCT  
GCTCTGATGCCGCATAGTTAAGCCAGTATCTGCTCCCTGCTTGTGTGTTGGA  
GGTCGCTGAGTAGTGC GCGAGCAAATTTAAGCTACAACAAGGCAAGGCT  
TGACCGACAATTGCATGAAGAATCTGCTTAGGGTTAGGCGTTTTGCGCTGC  
TTCGCGATGTACGGGCCAGATATACGCGTTGACATTGATTATTGACTAGTTAT  
TAATAGTAATCAATTACGGGGTCATTAGTTCATAGCCCATATATGGAGTTCCG  
CGTTACATAACTTACGGTAAATGGCCCCGCCTGGCTGACCGCCCAACGACCC  
CCGCCATTGACGTCAATAATGACGTATGTTCCCATAGTAACGCCAATAGGG  
ACTTTCATTGACGTCAATGGGTGGAGTATTACGGTAAACTGCCCACTTGG  
CAGTACATCAAGTGTATCATATGCCAAGTACGCCCCCTATTGACGTCAATGA  
CGGTAAATGGCCCCGCCTGGCATTATGCCCAGTACATGACCTTATGGGACTTT  
CCTACTTGGCAGTACATCTACGTATTAGTCATCGCTATTACCATGGTGATGCG  
GTTTTGGCAGTACATCAATGGGCGTGGATAGCGGTTTGACTCACGGGGATT  
TCCAAGTCTCCACCCCATGACGTCAATGGGAGTTTGTTTTGGCACCAAAA  
TCAACGGGACTTTCCAAAATGTCGTAACA ACTCCGCCCCATTGACGCAAAT  
GGGCGGTAGGCGTGTACGGTGGGAGGTCTATATAAGCAGAGCTCTCTGGCT  
AACTAGAGAACCCACTGCTTACTGGCTTATCGAAATTAATACGACTCACTAT  
AGGGAGACCCAAGCTGGCTAGCATGAGCGGCTACGTTAACAACCCCGAGG  
CTACAAACGCTCTCATCGACAAGGACGGCTGGCTGCACAGCGGCGACATC  
GCCTACTGGGACGAGGACGAGCACTTCTTCATCGTGGACCGGCTGAAGAG  
CCTGATCAAATACAAGGGCTACCAGGTAGCCCCAGCCGA ACTGGAGAGCA  
TCCTGCTGCAACACCCCAACATCTTCGACGCCGGGGTCGCCGGCCTGCCCG  
ACGACGATGCCGGCGAGCTGCCCCGCCGACGTCGTCGTGCTGGAACACGGT  
AAAACCATGACCGAGAAGGAGATCGTGGACTATGTGGCCAGCCAGGTTAC  
AACCGCCAAGAAGCTGCGCGGTGGTGTGTTGTGTTTCGTGGACGAGGTGCTA  
AAGGACTGACCGGCAAGTTGGACGCCCGCAAGATCCGCGAGATTCTCATT  
AAGGCCAAGAAGGGCGGCAAGATCGCCGTGCAAGCTTGGTACCGAGCTC  
GGATCCACTAGTCCAGTGTGGTGGAAATTCTGCAGATATCCAGCACAGTGGC  
GGCCGCTCGAGCCATGAACTGGTCCCATTCTGCATCTCCTTTTGCTGGATC  
TACTTTGCTGCTTCCAGACTGAGAGCTGCAGAGACGGCAGATGGAAAATAT  
GCTCAGAAGTTGTTAATGACCTTTTTGAAGATTATTCTAATGCTCTTCGTCC  
AGTGGAAGATACAGATAAAGTCCTGAATGTGACCCTGCAGATTACGCTCTC  
TCAGATTAAGGATATGGATGAAAGAAACCAAATTCTGACTGCTTATTTGTGG

ATCCGCCAAATCTGGCACGATGCCTATCTCACGTGGGACCGAGATCAGTAC  
GATGGCCTAGACTCCATCAGGATCCCCAGTGACCTCGTGTGGAGGCCAGAC  
ATCGTCTTATAACAAGGCTGATGATGAATCTTCAGAGCCTGTGAACACCA  
ATGTGGTCCTGCGGTATGATGGGCTGATCACCTGGGATGCACCGGCCATCA  
CCAAAAGCTCCTGTGTGGTGGATGTCACCTACTTCCCTTTTGACAACCAGC  
AGTGCAACCTGACTTTTGGTTCCTGGACCTACAATGGCAATCAGGTGGACA  
TATCAACGCCTTGGACAGCGGAGATCTCTGACTTCATTGAAGATGTGG  
AATGGGAGGTCCATGGCATGCCCGCTGTGAAGAATGTGATCTCCTATGGCT  
GCTGCTCTGAGCCTTACCCGGATGTCACATTCACCCTCCTTCTGAAGAGGA  
GGTCCTCGTTCTATATCGTCAACCTCCTCATCCCATGCGTCCTCATATCTTT  
CTGGCTCCTCTGAGTTTTTATCTCCCAGCAGCCTCCGGAGAAAAGGTCTCC  
CTGGGAGTGACCATCCTGTTGGCCATGACTGTATTTAGCTAATGGTGGCA  
GAAATCATGCCGGCCTCAGAAAATGTGCCCTGATAGGTAAATACTACATAG  
CCACGATGGCCCTGATCACAGCCTCCACTGCGTTGACCATCATGGTGTGATGA  
ATATCCACTTCTGTGGGGCCGAGGCCCGGGCCGGTGCCACACTGGGCCAGG  
GTGGTCATCCTGAAATACATGTCCAGGGTCTTGTTTGTCTATGATGTGGGTG  
AAAGCTGCCTCAGCCCGCACCACAGTAGAGAGCGGGACCACCTCACGAAA  
GTTTATAGCAAACCTCCAGAGTCTAACCTGAAAGCAGCCAGGAACAAAGA  
CCTTTCCAGAAAGAAGGACATGAACAAACGCTTAAAGAACGACCTGGGCT  
GCCAGGGTAAGAACCCTCAGGAGGCCGAGAGTTACTGTGCACAGTACAAA  
GTGCTGACGAGGAATATTGAGTACATCGCCAAGTGCCTCAAAGACCACAA  
GGCCACCAGTTCCAAGGGGAGTGAATGGAAGAAGGTGGCGAAAGTCATAG  
ACCGATTCTTCATGTGGATTTTTTTTCATTATGGTGTGTTGTGATGACTATTTTG  
ATCATAGCAAGAGCGGATTAGTCTAGAGGGCCCGTTTAAACCCGCTGATCA  
GCCTCGACTGTGCCTTCTAGTTGCCAGCCATCTGTTGTTTGCCCTCCCCCG  
TGCTTTCCTTGACCCTGGAAGGTGCCACTCCCACTGTCCTTTCCTAATAAA  
ATGAGGAAATTGCATCGCATTGTCTGAGTAGGTGTCATTCTATTCTGGGGGG  
TGGGGTGGGGCAGGACAGCAAGGGGGAGGATTGGGAAGACAATAGCAGG  
CATGCTGGGGATGCGGTGGGCTCTATGGCTTCTGAGGCGGAAAGAACCAG  
CTGGGGCTCTAGGGGGTATCCCCACGCGCCCTGTAGCGGCGCATTAAAGCGC  
GGCGGGTGTGGTGGTTACGCGCAGCGTGACCGCTACACTTGCCAGCGCCC  
TAGCGCCCCTCCTTTTCGCTTTCTTCCCTTCTTTCTCGCCACGTTTCGCCGG  
CTTTCCCCGTCAAGCTCTAAATCGGGGGCTCCCTTTAGGGTTCCGATTTAGT  
GCTTTACGGCACCTCGACCCCAAAAACTTGATTAGGGTGTGTTTACGT  
AGTGGGCCATCGCCCTGATAGACGGTTTTTTCGCCCTTTGACGTTGGAGTCC  
ACGTTCTTTAATAGTGGACTCTTGTTCCAAACCTGGAACAACACTCAACCCT  
ATCTCGGTCTATTCTTTTGATTTATAAGGGATTTTGCCGATTCGGCCTATTG  
GTTAAAAAATGAGCTGATTTAACAAAAATTTAACGCGAATTAATTCTGTGG

AATGTGTGTCAGTTAGGGTGTGGAAAGTCCCCAGGCTCCCCAGCAGGCAG  
AAGTATGCAAAGCATGCATCTCAATTAGTCAGCAACCAGGTGTGGAAAGTC  
CCCAGGCTCCCCAGCAGGCAGAAGTATGCAAAGCATGCATCTCAATTAGTC  
AGCAACCATAGTCCCGCCCCTAACTCCGCCCATCCCGCCCCTAACTCCGCC  
CAGTTCCGCCATTCTCCGCCCCATGGCTGACTAATTTTTTTTATTTATGCAG  
AGGCCGAGGCCGCCTCTGCCTCTGAGCTATTCCAGAAGTAGTGAGGAGGC  
TTTTTTGGAGGCCTAGGCTTTTGCAAAAAGCTCCCGGGAGCTTGTATATCCA  
TTTTCGGATCTGATCAAGAGACAGGATGAGGATCGTTTCGCATGATTGAAC  
AAGATGGATTGCACGCAGGTTCTCCGGCCGCTTGGGTGGAGAGGCTATTCCG  
GCTATGACTGGGCACAACAGACAATCGGCTGCTCTGATGCCGCCGTGTTCC  
GGCTGTCAGCGCAGGGGCGCCCGTTCCTTTTTGTCAAGACCGACCTGTCC  
GGTGCCCTGAATGAACTGCAGGACGAGGCAGCGCGGCTATCGTGGCTGGC  
CACGACGGGCGTTCCTTGCGCAGCTGTGCTCGACGTTGTCACTGAAGCGG  
GAAGGGACTGGCTGCTATTGGGCGAAGTGCCGGGGCAGGATCTCCTGTCAT  
CTCACCTTGCTCCTGCCGAGAAAGTATCCATCATGGCTGATGCAATGCGGC  
GGCTGCATACGCTTGATCCGGCTACCTGCCATTCGACCACCAAGCGAAAC  
ATCGCATCGAGCGAGCACGTACTIONCGGATGGAAGCCGGTCTTGTCGATCAGG  
ATGATCTGGACGAAGAGCATCAGGGGCTCGCGCCAGCCGAACTGTTCCGCC  
AGGCTCAAGGCGCGCATGCCCGACGGCGAGGATCTCGTCGTGACCCATGG  
CGATGCCTGCTTGCCGAATATCATGGTGGAAAATGGCCGCTTTTCTGGATTC  
ATCGACTGTGGCCGGCTGGGTGTGGCGGACCGCTATCAGGACATAGCGTTG  
GCTACCCGTGATATTGCTGAAGAGCTTGGCGGGCAATGGGCTGACCGCTTC  
CTCGTGCTTTACGGTATCGCCGCTCCCGATTTCGACGCGCATCGCCTTCTATC  
GCCTTCTTGACGAGTTCTTCTGAGCGGGACTCTGGGGTTCGAAATGACCGA  
CCAAGCGACGCCAACCTGCCATCACGAGATTCGATTCCACCGCCGCCTT  
CTATGAAAGGTTGGGCTTCGGAATCGTTTTCCGGGACGCCGGCTGGATGAT  
CCTCCAGCGCGGGGATCTCATGCTGGAGTTCTTCGCCACCCCAACTTGTT  
TATTGCAGCTTATAATGGTTACAAATAAAGCAATAGCATCACAAATTCACA  
AATAAAGCATTTTTTTTCACTGCATTCTAGTTGTGGTTTGTCCAAACTCATCA  
ATGTATCTTATCATGTCTGTATAACCGTCGACCTCTAGCTAGAGCTTGGCGTAA  
TCATGGTCATAGCTGTTTCCTGTGTGAAATTGTTATCCGCTCACAATTCCAC  
ACAACATACGAGCCGGAAGCATAAAGTGTAAGCCTGGGGTGCCTAATGA  
GTGAGCTAACTCACATTAATTGCGTTGCGCTCACTGCCCGCTTTCAGTCG  
GGAAACCTGTGCTGCCAGCTGCATTAATGAATCGGCCAACGCGCGGGGAG  
AGGCGGTTTGCATATTGGGCGCTCTTCCGCTTCTCGCTCACTGACTCGCT  
GCGCTCGGTCGTTCCGGCTGCGGCGAGCGGTATCAGCTCACTCAAAGGCGG  
TAATACGGTTATCCACAGAATCAGGGGATAACGCAGGAAAGAACATGTGAG  
CAAAAGGCCAGCAAAAGGCCAGGAACCGTAAAAAGGCCGCGTTGCTGGC

GTTTTTCCATAGGCTCCGCCCCCTGACGAGCATCACAAAATCGACGCTC  
AAGTCAGAGGTGGCGAAACCCGACAGGACTATAAAGATACCAGGCGTTTC  
CCCCTGGAAGCTCCCTCGTGCGCTCTCCTGTTCCGACCCTGCCGCTTACCG  
GATACCTGTCCGCCTTTCTCCCTTCGGGAAGCGTGGCGCTTTCTCATAGCTC  
ACGCTGTAGGTATCTCAGTTCGGTGTAGGTCGTTTCGCTCCAAGCTGGGCTG  
TGTGCACGAACCCCCCGTTCAGCCCGACCGCTGCGCCTTATCCGGTAACTA  
TCGTCTTGAGTCCAACCCGGTAAGACACGACTTATCGCCACTGGCAGCAGC  
CACTGGTAACAGGATTAGCAGAGCGAGGTATGTAGGCGGTGCTACAGAGTT  
CTTGAAGTGGTGGCCTAACTACGGCTACACTAGAAGAACAGTATTTGGTAT  
CTGCGCTCTGCTGAAGCCAGTTACCTTCGGAAAAAGAGTTGGTAGCTCTTG  
ATCCGGCAAACAAACCACCGCTGGTAGCGGTTTTTTTTGTTTGCAAGCAGCA  
GATTACGCGCAGAAAAAAGGATCTCAAGAAGATCCTTTGATCTTTTCTAC  
GGGGTCTGACGCTCAGTGGAACGAAAACCTCACGTTAAGGGATTTTGGTCAT  
GAGATTATCAAAAAGGATCTTCACCTAGATCCTTTTAAATTA AAAATGAAGT  
TTAAATCAATCTAAAGTATATATGAGTAAACTTGGTCTGACAGTTACCAAT  
GCTTAATCAGTGAGGCACCTATCTCAGCGATCTGTCTATTTTCGTTTCATCCATA  
GTTGCCTGACTCCCCGTCGTGTAGATAACTACGATACGGGAGGGCTTACCAT  
CTGGCCCCAGTGCTGCAATGATACCGCGAGACCCACGCTCACCGGCTCCAG  
ATTTATCAGCAATAAACCCAGCCAGCCGGAAGGGCCGAGCGCAGAAGTGGT  
CCTGCAACTTTATCCGCCTCCATCCAGTCTATTAATTGTTGCCGGGAAGCTA  
GAGTAAGTAGTTCGCCAGTTAATAGTTTTCGCGCAACGTTGTTGCCATTGCTAC  
AGGCATCGTGGTGTACGCTCGTCGTTTGGTATGGCTTCATTTCAGCTCCGGT  
TCCCAACGATCAAGGCGAGTTACATGATCCCCATGTTGTGCAAAAAAGCG  
GTTAGCTCCTTCGGTCCCTCCGATCGTTGTCAGAAGTAAGTTGGCCGCAGTG  
TTACTACTCATGGTTATGGCAGCACTGCATAATTCTCTTACTGTCATGCCATC  
CGTAAGATGCTTTTCTGTGACTGGTGAGTACTCAACCAAGTCATTCTGAGA  
ATAGTGTATGCGGCGACCGAGTTGCTCTTGCCCGGCGTCAATACGGGATAAT  
ACCGCGCCACATAGCAGAACTTTAAAAGTGCTCATCATTGGAAAACGTTCT  
TCGGGGCGAAAACCTCTCAAGGATCTTACCGCTGTTGAGATCCAGTTCGATG  
TAACCCACTCGTGCACCCA ACTGATCTTCAGCATCTTTTACTTTCACCAGCG  
TTTCTGGGTGAGCAAAAACAGGAAGGCAAAATGCCGCAAAAAAGGGAAT  
AAGGGCGACACGGAAATGTTGAATACTCATACTCTTCCTTTTCAATATTAT  
TGAAGCATTATCAGGGTTATTGTCTCATGAGCGGATACATATTTGAATGTAT  
TTAGAAAAATAACAAATAGGGGTTCCGCGCACATTTCCCCGAAAAGTGCC  
ACCTGACGTC

PCDNA3.1 CHRNA9-Nluc

PROMOTER

Nluc

Linker

CHRNA9

GACGGATCGGGAGATCTCCCGATCCCCTATGGTGCACTCTCAGTACAATCT  
GCTCTGATGCCGCATAGTTAAGCCAGTATCTGCTCCCTGCTTGTGTGTTGGA  
GGTCGCTGAGTAGTGC GCGAGCAAATTTAAGCTACAACAAGGCAAGGCT  
TGACCGACAATTGCATGAAGAATCTGCTTAGGGTTAGGCGTTTTGCGCTGC  
TTCGCGATGTACGGGCCAGATATACGCGTTGACATTGATTATTGACTAGTTAT  
TAATAGTAATCAATTACGGGGTCATTAGTTCATAGCCCATATATGGAGTTCCG  
CGTTACATAACTTACGGTAAATGGCCCGCCTGGCTGACCGCCCAACGACCC  
CCGCCATTGACGTCAATAATGACGTATGTTCCCATAGTAACGCCAATAGGG  
ACTTTCATTGACGTCAATGGGTGGAGTATTTACGGTAAACTGCCCACTTGG  
CAGTACATCAAGTGTATCATATGCCAAGTACGCCCCCTATTGACGTCAATGA  
CGGTAAATGGCCCGCCTGGCATTATGCCCAGTACATGACCTTATGGGACTTT  
CCTACTTGGCAGTACATCTACGTATTAGTCATCGCTATTACCATGGTGATGCG  
GTTTTGGCAGTACATCAATGGGCGTGGATAGCGGTTTGACTCACGGGGATT  
TCCAAGTCTCCACCCCATGACGTCAATGGGAGTTTGTGTTTGGCACCAAAA  
TCAACGGGACTTTCCAAAATGTCGTAACAACCTCCGCCCCATTGACGCAAAT  
GGGCGGTAGGCGTGTACGGTGGGAGGTCTATATAAGCAGAGCTCTCTGGCT  
AACTAGAGAACCCACTGCTTACTGGCTTATCGAAATTAATACGACTCACTAT  
AGGGAGACCCAAGCTGGCTAGCATGGAAGATGCCAAAAACATTAAGAAGG  
GCCCAGCGCCATTCTACCCACTCGAAGACGGGACCGCCGGCGAGCAGCTG  
CACAAAGCCATGAAGCGCTACGCCCTGGTGCCCGGCACCATCGCCTTTACC  
GACGCACATATCGAGGTGGACATTACCTACGCCGAGTACTTCGAGATGAGC  
GTTTCGGCTGGCAGAAGCTATGAAGCGCTATGGGCTGAATACAAACCATCGG  
ATCGTGGTGTGCAGCGAGAATAGCTTGCAGTTCTTCATGCCCGTGTTGGGT  
GCCCTGTTCATCGGTGTGGCTGTGGCCCCAGCTAACGACATCTACAACGAG  
CGCGAGCTGCTGAACAGCATGGGCATCAGCCAGCCCACCGTCGTATTCGTG  
AGCAAGAAAGGGCTGCAAAGATCCTCAACGTGCAAAGAAGCTACCGAT  
CATAAAAAGATCATCATCATGGATAGCAAGACCGACTACCAGGGCTTCCA  
AAGCATGTACACCTTCGTGACTTCCCATTTGCCACCCGGCTTCAACGAGTA  
CGACTTCGTGCCCGAGAGCTTCGACCGGGACAAAACCATCGCCCTGATCAT  
GAACAGTAGTGGCAGTACCGGATTGCCCAAGGGCGTAGCCCTACCGCACC  
GCACCGCTTGTGTCCGATTCAGTCATGCCCGCGACCCCATCTTCGGCAACC  
AGATCATCCCCGACACCGCTATCCTCAGCGTGGTGCCATTTCAACACGGCTT  
CGGCATGTTCAACACGCTGGGCTACTTGATCTGCGGCTTTCGGGTCGTGCT



CATGTACCGCTTCGAGGAGGAGCTATTCTTGCGCAGCTTGCAAGACTATAA  
GATTCAATCTGCCCTGCTGGTGCCACACTATTTAGCTTCTTCGCTAAGAGC  
ACTCTCATCGACAAGTACGACCTAAGCAACTTGCACGAGATCGCCAGCGG  
CGGGGCGCCGCTCAGCAAGGAGGTAGGTGAGGCCGTGGCCAAACGCTTCC  
ACCTACCAGGCATCCGCCAGGGCTACGGCCTGACAGAAACAACCAGCGCC  
ATTCTGATCACCCCGAAGGGGACGACAAGCCTGGCGCAGTAGGCAAGGT  
GGTGCCCTTCTTCGAGGCTAAGGTGGTGGACTTGGACACCGGTAAGACAC  
TGGGTGTGAACCAGCGCGGCGAGCTGTGCGTCCGTGGCCCCATGATCATG  
AGCGGCTACGTTAACAACCCCGAGGCTACAAACGCTCTCATCGACAAGGA  
CGGCGGAAGCTTGGTACCGAGCTCGGATCCACTAGTCCAGTGTGGTGGAAAT  
TCTGCAGATATCCAGCACAGTGGCGGGCCGCTCGAGCCATGAACTGGTCCCA  
TTCCTGCATCTCCTTTTGGCTGGATCTACTTTGCTGCTTCCAGACTGAGAGCT  
GCAGAGACGGCAGATGGAAAATATGCTCAGAAGTTGTTTAATGACCTTTT  
GAAGATTATTCTAATGCTCTTCGTCCAGTGGAAGATACAGATAAAGTCTGA  
ATGTGACCCTGCAGATTACGCTCTCTCAGATTAAGGATATGGATGAAAGAA  
ACCAAATTCTGACTGCTTATTTGTGGATCCGCCAAATCTGGCACGATGCCTA  
TCTCACGTGGGACCGAGATCAGTACGATGGCCTAGACTCCATCAGGATCCC  
CAGTGACCTCGTGTGGAGGCCAGACATCGTCTTATATAACAAGGCTGATGA  
TGAATCTTCAGAGCCTGTGAACACCAATGTGGTCCGTGCGGTATGATGGGCT  
GATCACCTGGGATGCACCGGCCATCACAAAAGCTCCTGTGTGGTGGATGT  
CACCTACTTCCCTTTTGACAACCAGCAGTGCAACCTGACTTTTGGTTCCTG  
GACCTACAATGGCAATCAGGTGGACATATTCAACGCCTTGGACAGCGGAGA  
TCTCTCTGACTTCATTGAAGATGTGGAATGGGAGGTCCATGGCATGCCCGC  
TGTGAAGAATGTGATCTCCTATGGCTGCTGCTCTGAGCCTTACCCGGATGTC  
ACATTCACCTCCTTCTGAAGAGGAGGTCCCTCGTTCTATATCGTCAACCTCC  
TCATCCCATGCGTCCTCATATCTTTTCTGGCTCCTCTGAGTTTTTATCTCCCA  
GCAGCCTCCGGAGAAAAGGTCTCCCTGGGAGTGACCATCCTGTTGGCCAT  
GACTGTATTTAGCTAATGGTGGCAGAAATCATGCCGGCCTCAGAAAATGT  
GCCCCTGATAGGTAAATACTACATAGCCACGATGGCCCTGATCACAGCCTCC  
ACTGCGTTGACCATCATGGTGTGATGAATATCCACTTCTGTGGGGCCGAGGCC  
CGGCCGGTGCCACACTGGGCCAGGGTGGTCATCCTGAAATACATGTCCAGG  
GTCTTGTGTGTCTATGATGTGGGTGAAAGCTGCCTCAGCCCGCACCCACAGT  
AGAGAGCGGGACCACCTCACGAAAGTTTATAGCAAACCTCCAGAGTCTAA  
CCTGAAAGCAGCCAGGAACAAAGACCTTTCCAGAAAGAAGGACATGAAC  
AAACGCTTAAAGAACGACCTGGGCTGCCAGGGTAAGAACCCTCAGGAGGC  
CGAGAGTTACTGTGCACAGTACAAAGTGCTGACGAGGAATATTGAGTACAT  
CGCCAAGTGCCTCAAAGACCACAAGGCCACCAGTTCCAAGGGGAGTGAAT  
GGAAGAAGGTGGCGAAAGTCATAGACCGATTCTTCATGTGGATTTTTTTCA

TTATGGTGTTTGTGATGACTATTTGATCATAGCAAGAGCGGATTAGTCTAG  
AGGGCCCCGTTTAAACCCGCTGATCAGCCTCGACTGTGCCTTCTAGTTGCCA  
GCCATCTGTTGTTTGCCCCCTCCCCCGTGCCTTCCTTGACCCTGGAAGGTGC  
CACTCCCCTGTCCTTTCCTAATAAAATGAGGAAATTGCATCGCATTGTCTG  
AGTAGGTGTCATTCTATTCTGGGGGGTGGGGTGGGGCAGGACAGCAAGGG  
GGAGGATTGGGAAGACAATAGCAGGCATGCTGGGGATGCGGTGGGCTCTA  
TGGCTTCTGAGGCGGAAAGAACCAGCTGGGGCTCTAGGGGGTATCCCCAC  
GCGCCCTGTAGCGGCGCATTAAAGCGCGGCGGGTGTGGTGGTTACGCGCAG  
CGTGACCGCTACACTTGCCAGCGCCCTAGCGCCCGCTCCTTTCGCTTTCCTC  
CCTTCCTTTCGCCCACGTTTCGCCGGCTTTCGCCGTCAAGCTCTAAATCGGG  
GGCTCCCTTTAGGGTTCGATTAGTGCTTACGGCACCTCGACCCCAAAA  
AACTTGATTAGGGTGTGGTTCACGTAGTGGGCCATCGCCCTGATAGACGG  
TTTTTCGCCCTTTCGCGTTGGAGTCCACGTTCTTTAATAGTGGACTCTTGTT  
CCAACTGGAACAACACTCAACCCTATCTCGGTCTATTCTTTTGATTTATAA  
GGGATTTTGCCGATTCGGCCTATTGGTTAAAAAATGAGCTGATTTAACAAA  
AATTTAACGCGAATTAATTCTGTGGAATGTGTGTCAGTTAGGGTGTGGAAA  
GTCCCCAGGCTCCCCAGCAGGCAGAAGTATGCAAAGCATGCATCTCAATTA  
GTCAGCAACCAGGTGTGGAAAGTCCCCAGGCTCCCCAGCAGGCAGAAGTA  
TGCAAAGCATGCATCTCAATTAGTCAGCAACCATAGTCCCGCCCCTAACTCC  
GCCATCCCGCCCCTAACTCCGCCAGTTCGCCCATCTCCGCCCCATGGC  
TGACTAATTTTTTTTATTTATGCAGAGGCCGAGGCCGCTCTGCCTCTGAGC  
TATCCAGAAGTAGTGAGGAGGCTTTTTTGGAGGCCTAGGCTTTTGCAAAA  
AGCTCCCGGGAGCTTGTATATCCATTTTCGGATCTGATCAAGAGACAGGATG  
AGGATCGTTTCGCATGATTGAACAAGATGGATTGCACGCAGGTTCTCCGGC  
CGCTTGGGTGGAGAGGCTATTCGGCTATGACTGGGCACAACAGACAATCG  
GCTGCTCTGATGCCGCCGTGTTCCGGCTGTCAGCGCAGGGGCGCCCGGTTT  
TTTTTGTCAAGACCGACCTGTCCGGTGCCCTGAATGAACTGCAGGACGAG  
GCAGCGCGGCTATCGTGGCTGGCCACGACGGGCGTTCCTTGCGCAGCTGT  
GCTCGACGTTGTCACTGAAGCGGGAAGGGACTGGCTGCTATTGGGCGAAG  
TGCCGGGGCAGGATCTCCTGTCATCTCACCTTGCTCCTGCCGAGAAAGTAT  
CCATCATGGCTGATGCAATGCGGCGGCTGCATACGCTTGATCCGGCTACCTG  
CCCATTGACCACCAAGCGAAACATCGCATCGAGCGAGCACGTACTCGGAT  
GGAAGCCGGTCTTGTGATCAGGATGATCTGGACGAAGAGCATCAGGGGC  
TCGCGCCAGCCGAACTGTTCCGCCAGGCTCAAGGCGCGCATGCCCGACGGC  
GAGGATCTCGTCGTGACCCATGGCGATGCCTGCTTGCCGAATATCATGGTG  
GAAAATGGCCGCTTTTCTGGATTCATCGACTGTGGCCGGCTGGGTGTGGCG  
GACCGCTATCAGGACATAGCGTTGGCTACCCGTGATATTGCTGAAGAGCTT  
GGCGGCGAATGGGCTGACCGCTTCTCGTGCTTTACGGTATCGCCGCTCCC

GATTCGCAGCGCATCGCCTTCTATCGCCTTCTTGACGAGTTCTTCTGAGCGG  
GACTCTGGGGTTCGAAATGACCGACCAAGCGACGCCAACCTGCCATCAC  
GAGATTTTCGATTCCACCGCCGCCTTCTATGAAAGGTTGGGCTTCGGAATCG  
TTTTCCGGGACGCCGGCTGGATGATCCTCCAGCGCGGGGATCTCATGCTGG  
AGTTCTTCGCCCACCCCAACTTGTTTATTGCAGCTTATAATGGTTACAAATA  
AAGCAATAGCATCACAAATTTACAAATAAAGCATTTTTTTCACTGCATTCT  
AGTTGTGGTTTGTCCAAACTCATCAATGTATCTTATCATGTCTGTATACCGTC  
GACCTCTAGCTAGAGCTTGGCGTAATCATGGTCATAGCTGTTTCCTGTGTGA  
AATTGTTATCCGCTCACAATTCCACACAACATACGAGCCGGAAGCATAAAG  
TGAAAGCCTGGGGTGCCTAATGAGTGAGCTAACTCACATTAATTGCGTTG  
CGCTCACTGCCCGCTTTCAGTCGGGAAACCTGTCGTGCCAGCTGCATTAA  
TGAATCGGCCAACGCGCGGGGAGAGGCGGTTTGGCGTATTGGGCGCTCTTCC  
GCTTCCTCGCTCACTGACTCGCTGCGCTCGGTCGTTTCGGCTGCGGCGAGCG  
GTATCAGCTCACTCAAAGGCGGTAATACGGTTATCCACAGAATCAGGGGAT  
AACGCAGGAAAGAACATGTGAGCAAAGGCCAGCAAAGGCCAGGAACC  
GTAAAAGGCCGCGTTGCTGGCGTTTTTCCATAGGCTCCGCCCCCTGACG  
AGCATCACAAAATCGACGCTCAAGTCAGAGGTGGCGAAACCCGACAGG  
ACTATAAAGATAACCAGGCGTTTCCCCCTGGAAGCTCCCTCGTGCGCTCTCCT  
GTTCCGACCCTGCCGTTACCGGATACCTGTCCGCCTTCTCCCTTCGGGAA  
GCGTGGCGCTTCTCATAGCTCACGCTGTAGGTATCTCAGTTCGGTGTAGGT  
CGTTCGCTCCAAGCTGGGCTGTGTGCACGAACCCCCGTTTCAGCCCGACC  
GCTGCGCCTTATCCGGTAACTATCGTCTTGAGTCCAACCCGGTAAGACACG  
ACTTATCGCCACTGGCAGCAGCCACTGGTAACAGGATTAGCAGAGCGAGG  
TATGTAGGCGGTGCTACAGAGTTCTTGAAGTGGTGGCCTAACTACGGCTAC  
ACTAGAAGAACAGTATTTGGTATCTGCGCTCTGCTGAAGCCAGTTACCTTC  
GGAAAAAGAGTTGGTAGCTCTTGATCCGGCAAACAAACCACCGCTGGTAG  
CGGTTTTTTTGTGGCAAGCAGCAGATTACGCGCAGAAAAAAGGATCTCA  
AGAAGATCCTTTGATCTTTTCTACGGGGTCTGACGCTCAGTGGAACGAAAA  
CTCACGTTAAGGGATTTTGGTCATGAGATTATCAAAAAGGATCTTCACCTAG  
ATCCTTTTAAATTAATAATGAAGTTTTAAATCAATCTAAAGTATATATGAGTA  
AACTTGGTCTGACAGTTACCAATGCTTAATCAGTGAGGCACCTATCTCAGC  
GATCTGTCTATTTTCGTTTCATCCATAGTTGCCTGACTCCCCGTCGTGTAGATAA  
CTACGATACGGGAGGGCTTACCATCTGGCCCCAGTGCTGCAATGATACCGC  
GAGACCCACGCTCACCGGCTCCAGATTTATCAGCAATAAACCAGCCAGCCG  
GAAGGGCCGAGCGCAGAAGTGGTCCTGCAACTTTATCCGCCTCCATCCAGT  
CTATTAATTGTTGCCGGGAAGCTAGAGTAAGTAGTTCGCCAGTTAATAGTTT  
GCGCAACGTTGTTGCCATTGCTACAGGCATCGTGGTGTACGCTCGTCGTT  
TGGTATGGCTTCATTCAGCTCCGGTTCCCAACGATCAAGGCGAGTTACATG

ATCCCCCATGTTGTGCAAAAAGCGGTTAGCTCCTTCGGTCCTCCGATCGTT  
GTCAGAAGTAAGTTGGCCGCAGTGTTATCACTCATGGTTATGGCAGCACTG  
CATAATTCTCTTACTGTCATGCCATCCGTAAGATGCTTTTCTGTGACTGGTGA  
GTACTCAACCAAGTCATTCTGAGAATAGTGTATGCGGCGACCGAGTTGCTC  
TTGCCCGGCGTCAATACGGGATAATACCGCGCCACATAGCAGAACTTTAAA  
AGTGCTCATCATTGGAAAACGTTCTTCGGGGCGAAAACCTCTCAAGGATCTT  
ACCGCTGTTGAGATCCAGTTCGATGTAACCCACTCGTGCACCCAACTGATC  
TTCAGCATCTTTTACTTTCACCAGCGTTTCTGGGTGAGCAAAAACAGGAAG  
GCAAATGCCGCAAAAAGGAATAAGGGCGACACGGAAATGTTGAATAC  
TCATACTCTTCCTTTTCAATATTATTGAAGCATTATCAGGGTTATTGTCTCA  
TGAGCGGATACATATTTGAATGTATTTAGAAAAATAAACAAATAGGGGTTC  
GCGCACATTTCCCCGAAAAGTGCCACCTGACGTC

PCDNA3.1 ERBB2-Cluc

PROMOTER

Cluc

Linker

ERBB2

GACGGATCGGGAGATCTCCCGATCCCCTATGGTGC ACTCTCAGTACAATCT  
GCTCTGATGCCGCATAGTTAAGCCAGTATCTGCTCCCTGCTTGTGTGTTGGA  
GGTCGCTGAGTAGTGC GCGAGCAAATTTAAGCTACAACAAGGCAAGGCT  
TGACCGACAATTGCATGAAGAATCTGCTTAGGGTTAGGCGTTTTGCGCTGC  
TTCGCGATGTACGGGCCAGATATACGCGTTGACATTGATTATTGACTAGTTAT  
TAATAGTAATCAATTACGGGGTCATTAGTTCATAGCCCATATATGGAGTTCCG  
CGTTACATAACTTACGGTAAATGGCCCGCCTGGCTGACCGCCAACGACCC  
CCGCCATTGACGTCAATAATGACGTATGTTCCCATAGTAACGCCAATAGGG  
ACTTTCATTGACGTCAATGGGTGGAGTATTTACGGTAAACTGCCCACTTGG  
CAGTACATCAAGTGTATCATATGCCAAGTACGCCCCCTATTGACGTCAATGA  
CGGTAAATGGCCCGCCTGGCATTATGCCCAGTACATGACCTTATGGGACTTT  
CCTACTTGGCAGTACATCTACGTATTAGTCATCGCTATTACCATGGTGATGCG  
GTTTTGGCAGTACATCAATGGGCGTGGATAGCGGTTTGACTCACGGGGATT  
TCCAAGTCTCCACCCCATGACGTCAATGGGAGTTTGTTTTGGCACCAAAA  
TCAACGGGACTTTCCAAAATGTCGTAACA ACTCCGCCCATGACGCAAT  
GGGCGGTAGGCGTGTACGGTGGGAGGTCTATATAAGCAGAGCTCTCTGGCT  
AACTAGAGAACCCACTGCTTACTGGCTTATCGAAATTAATACGACTCACTAT  
AGGGAGACCCAAGCTGGCTAGCATGAGCGGCTACGTTAACAACCCCGAGG  
CTACAAACGCTCTCATCGACAAGGACGGCTGGCTGCACAGCGGCGACATC  
GCCTACTGGGACGAGGACGAGCACTTCTTCATCGTGGACCGGCTGAAGAG  
CCTGATCAAATACAAGGGCTACCAGGTAGCCCCAGCCGA ACTGGAGAGCA  
TCCTGCTGCAACACCCCAACATCTTCGACGCCGGGGTCGCCGGCCTGCCCG  
ACGACGATGCCGGCGAGCTGCCCGCCG CAGTCGTCGTGCTGGAACACGGT  
AAAACCATGACCGAGAAGGAGATCGTGGACTATGTGGCCAGCCAGGTTAC  
AACCGCCAAGAAGCTGCGCGGTGGTGTGTTGTGTTTCGTGGACGAGGTGCCTA  
AAGGACTGACCGGCAAGTTGGACGCCCGCAAGATCCGCGAGATTCTCATT  
AAGGCCAAGAAGGGCGGCAAGATCGCCGTGCAAGCTTGGTACCGAGCTC  
GGATCCACTAGTCCAGTGTGGTGG AATTCTGCAGATATCCAGCACAGTGGC  
GGCCGCTCGAGCCATGGAGCTGGCGGCCTTGTGCCGCTGGGGGCTCCTCC  
TCGCCCTCTTGCCCCCGGAGCCGCGAGCACCCAAGTGTGCACCGGCACA  
GACATGAAGCTGCGGCTCCCTGCCAGTCCCGAGACCCACCTGGACATGCT  
CCGCCACCTCTACCAGGGCTGCCAGGTGGTGCAGGGAAACCTGGA ACTCA

CCTACCTGCCACCAATGCCAGCCTGTCCTTCCTGCAGGATATCCAGGAGG  
TGCAGGGCTACGTGCTCATCGCTACAACCAAGTGAGGCAGGTCCCCTG  
CAGAGGCTGCGGATTGTGCGAGGCACCCAGCTCTTTGAGGACAACCTATGC  
CCTGGCCGTGCTAGACAATGGAGACCCGCTGAACAATACCACCCCTGTAC  
AGGGGCCTCCCAGGAGGCCTGCGGGAGCTGCAGCTTCGAAGCCTCACAG  
AGATCTTGAAAGGAGGGGTCTTGATCCAGCGGAACCCCCAGCTCTGCTACC  
AGGACACGATTTTGTGGAAGGACATCTTCCACAAGAACAACCAGCTGGCT  
CTCACACTGATAGACACCAACCGCTCTCGGGCCTGCCACCCCTGTTCTCCG  
ATGTGTAAGGGCTCCCGCTGCTGGGGAGAGAGTTCTGAGGATTGTCAGAG  
CCTGACGCGCACTGTCTGTGCCGGTGGCTGTGCCCGCTGCAAGGGGCCAC  
TGCCCACTGACTGCTGCCATGAGCAGTGTGCTGCCGGCTGCACGGGCCCC  
AAGCACTCTGACTGCCTGGCCTGCCTCCACTTCAACCACAGTGGCATCTGT  
GAGCTGCACTGCCAGCCCTGGTCACCTACAACACAGACACGTTTGAGTC  
CATGCCCAATCCCGAGGGCCGGTATACATTCGGCGCCAGCTGTGTGACTGC  
CTGTCCCTACAACCTTTCTACGGACGTGGGATCCTGCACCCTCGTCTGC  
CCCCTGCACAACCAAGAGGTGACAGCAGAGGATGGAACACAGCGGTGTG  
AGAAGTGCAGCAAGCCCTGTGCCCGAGTGTGCTATGGTCTGGGCATGGAG  
CACTTGCAGAGAGGTGAGGGCAGTTACCAGTGCCAATATCCAGGAGTTTGCT  
GGCTGCAAGAAGATCTTTGGGAGCCTGGCATTCTGCCGGAGAGCTTTGAT  
GGGGACCAGCCTCCAACACTGCCCCGCTCCAGCCAGAGCAGCTCCAAGT  
GTTTGAGACTCTGGAAGAGATCACAGGTTACCTATACATCTCAGCATGGCC  
GGACAGCCTGCCTGACCTCAGCGTCTTCCAGAACCTGCAAGTAATCCGGG  
GACGAATTCTGCACAATGGCGCCTACTCGCTGACCCTGCAAGGGCTGGGC  
ATCAGCTGGCTGGGGCTGCGCTCACTGAGGGAACTGGGCAGTGGACTGGC  
CCTCATCCACCATAACACCCACCTCTGCTTCGTGCACACGGTGCCCTGGGA  
CCAGCTCTTTCGGAACCCGCACCAAGCTCTGCTCCACACTGCCAACCGGC  
CAGAGGACGAGTGTGTGGGCGAGGGCCTGGCCTGCCACCAGCTGTGCGCC  
CGAGGGCACTGCTGGGGTCCAGGGCCCACCCAGTGTGTCAACTGCAGCCA  
GTTCCCTTCGGGGCCAGGAGTGCCTGGAGGAATGCCGAGTACTGCAGGGGC  
TCCCCAGGGAGTATGTGAATGCCAGGCACTGTTTGCCGTGCCACCCTGAGT  
GTCAGCCCCAGAATGGCTCAGTGACCTGTTTTGGACCGGAGGCTGACCAG  
TGTGTGGCCTGTGCCACTATAAGGACCCTCCCTTCTGCGTGGCCCGCTGC  
CCCAGCGGTGTGAAACCTGACCTCTCCTACATGCCATCTGGAAGTTTCCA  
GATGAGGAGGGCGCATGCCAGCCTTGCCCCATCAACTGCACCCACTCCTGT  
GTGGACCTGGATGACAAGGGCTGCCCGCCGAGCAGAGAGCCAGCCCTCT  
GACGTCCATCATCTCTGCGGTGGTTGGCATTCTGCTGGTCGTGGTCTTGGG  
GGTGGTCTTTGGGATCCTCATCAAGCGACGGCAGCAGAAGATCCGGAAGT  
ACACGATGCGGAGACTGCTGCAGGAAACGGAGCTGGTGGAGCCGCTGAC

ACCTAGCGGAGCGATGCCCAACCAGGCGCAGATGCGGATCCTGAAAGAGA  
CGGAGCTGAGGAAGGTGAAGGTGCTTGGATCTGGCGCTTTTGGCACAGTC  
TACAAGGGCATCTGGATCCCTGATGGGGAGAATGTGAAAATTCCAGTGGCC  
ATCAAAGTGTGAGGGAAAACACATCCCCAAAGCCAACAAAGAAATCTT  
AGACGAAGCATACTGATGGCTGGTGTGGGCTCCCCATATGTCTCCCGCT  
TCTGGGCATCTGCCTGACATCCACGGTGCAGCTGGTGACACAGCTTATGCC  
CTATGGCTGCCTCTTAGACCATGTCCGGGAAAACCGCGGACGCCTGGGCTC  
CCAGGACCTGCTGAACTGGTGTATGCAGATTGCCAAGGGGATGAGCTACCT  
GGAGGATGTGCGGCTCGTACACAGGGACTTGGCCGCTCGGAACGTGCTGG  
TCAAGAGTCCCAACCATGTCAAATTACAGACTTCGGGCTGGCTCGGCTGC  
TGGACATTGACGAGACAGAGTACCATGCAGATGGGGGCAAGGTGCCCATC  
AAGTGGATGGCGCTGGAGTCCATTCTCCGCCGGCGGTTACCCACCAGAG  
TGATGTGTGGAGTTATGGTGTGACTGTGTGGGAGCTGATGACTTTTGGGGC  
CAAACCTTACGATGGGATCCCAGCCCCGGGAGATCCCTGACCTGCTGGAAA  
AGGGGGAGCGGCTGCCCCAGCCCCCATCTGCACCATTGATGTCTACATGA  
TCATGGTCAAATGTTGGATGATTGACTCTGAATGTCGGCCAAGATTCCGGG  
AGTTGGTGTCTGAATTCTCCCGCATGGCCAGGGACCCCCAGCGCTTTGTGG  
TCATCCAGAATGAGGACTTGGGCCCAGCCAGTCCCTTGGACAGCACCTTCT  
ACCGCTCACTGCTGGAGGACGATGACATGGGGGACCTGGTGGATGCTGAG  
GAGTATCTGGTACCCAGCAGGGCTTCTTCTGTCCAGACCCTGCCCCGGGC  
GCTGGGGGCATGGTCCACCACAGGCACCGCAGCTCATCTACCAGGAGTGG  
CGGTGGGGACCTGACACTAGGGCTGGAGCCCTCTGAAGAGGAGGCCCCCA  
GGTCTCCACTGGCACCCCTCCGAAGGGGCTGGCTCCGATGTATTTGATGGTG  
ACCTGGGAATGGGGGCAGCCAAGGGGCTGCAAAGCCTCCCCACACATGAC  
CCCAGCCCTTACAGCGGTACAGTGAGGACCCACAGTACCCTGCCCTCT  
GAGACTGATGGCTACGTTGCCCCCTGACCTGCAGCCCCAGCCTGAATAT  
GTGAACCAGCCAGATGTTCCGGCCCCAGCCCCCTTCGCCCCGAGAGGGCCC  
TCTGCCTGCTGCCCCGACCTGCTGGTGCCACTCTGGAAAGGCCCAAGACTCT  
CTCCCCAGGGAAGAATGGGGTCGTCAAAGACGTTTTTGCCTTTGGGGGTG  
CCGTGGAGAACCCCGAGTACTTGACACCCAGGGAGGAGCTGCCCTCAG  
CCCCACCCTCCTCCTGCCTTCAGCCCAGCCTTCGACAACCTCTATTACTGGG  
ACCAGGACCCACCAGAGCGGGGGGCTCCACCCAGCACCTTCAAAGGGAC  
ACCTACGGCAGAGAACCAGAGTACCTGGGTCTGGACGTGCCAGTGTGAT  
CTAGAGGGCCCGTTTAAACCCGCTGATCAGCCTCGACTGTGCCTTCTAGTT  
GCCAGCCATCTGTTGTTTGCCCCTCCCCCGTGCCTTCCTTGACCCTGGAAG  
GTGCCACTCCCACTGTCCTTTCCCTAATAAAAATGAGGAAATTGCATCGCATTG  
TCTGAGTAGGTGTCATTCTATTCTGGGGGGTGGGGTGGGGCAGGACAGCA  
AGGGGGAGGATTGGGAAGACAATAGCAGGCATGCTGGGGATGCGGTGGGC

TCTATGGCTTCTGAGGCGGAAAGAACCAGCTGGGGCTCTAGGGGGTATCCC  
CACGCGCCCTGTAGCGGCGCATTAAAGCGCGGCGGGTGTGGTGGTTACGCG  
CAGCGTGACCGCTACACTTGCCAGCGCCCTAGCGCCCGCTCCTTTCGCTTT  
CTTCCCTTCCCTTCTCGCCACGTTCCGCCGGCTTCCCCGTCAAGCTCTAAAT  
CGGGGGCTCCCTTTAGGGTTCGGATTTAGTGCTTTACGGCACCTCGACCCC  
AAAAAACTTGATTAGGGTGATGGTTCACGTAGTGGGCCATCGCCCTGATAG  
ACGGTTTTTTCGCCCTTTGACGTTGGAGTCCACGTTCTTTAATAGTGGACTCT  
TGTTCCAAACTGGAACAACACTCAACCCTATCTCGGTCTATTCTTTTGATT  
ATAAGGGATTTTGCCGATTTCCGGCCTATTGGTTAAAAAATGAGCTGATTAA  
CAAAAATTTAACGCGAATTAATTCTGTGGAATGTGTGTCAGTTAGGGTGTG  
GAAAGTCCCCAGGCTCCCCAGCAGGCAGAAGTATGCAAAGCATGCATCTC  
AATTAGTCAGCAACCAGGTGTGGAAAGTCCCCAGGCTCCCCAGCAGGCAG  
AAGTATGCAAAGCATGCATCTCAATTAGTCAGCAACCATAGTCCCGCCCCTA  
ACTCCGCCCATCCCGCCCCTAACTCCGCCCAGTTCGGCCATTCTCCGCCCC  
ATGGCTGACTAATTTTTTTTATTTATGCAGAGGCCGAGGCCGCCTCTGCCTC  
TGAGCTATTCCAGAAGTAGTGAGGAGGCTTTTTTGGAGGCCTAGGCTTTTG  
CAAAAAGCTCCCGGGAGCTTGTATATCCATTTTCGGATCTGATCAAGAGAC  
AGGATGAGGATCGTTTTCGCATGATTGAACAAGATGGATTGCACGCAGGTTC  
TCCGGCCGCTTGGGTGGAGAGGCTATTCGGCTATGACTGGGCACAACAGA  
CAATCGGCTGCTCTGATGCCGCCGTGTTCCGGCTGTCAGCGCAGGGGCGCC  
CGGTTCTTTTTGTCAAGACCGACCTGTCCGGTGCCCTGAATGAACTGCAGG  
ACGAGGCAGCGCGGCTATCGTGGCTGGCCACGACGGGCGTTCCTTGCGCA  
GCTGTGCTCGACGTTGTCACTGAAGCGGGAAGGGACTGGCTGCTATTGGG  
CGAAGTGCCGGGGCAGGATCTCCTGTCATCTCACCTTGCTCCTGCCGAGAA  
AGTATCCATCATGGCTGATGCAATGCGGGCGGCTGCATACGCTTGATCCGGCT  
ACCTGCCCATTCGACCACCAAGCGAAACATCGCATCGAGCGAGCACGTA  
CGGATGGAAGCCGTCTTGTCGATCAGGATGATCTGGACGAAGAGCATCA  
GGGGCTCGCGCCAGCCGAACTGTTCCGCCAGGCTCAAGGCGCGCATGCCCG  
ACGGCGAGGATCTCGTCGTGACCCATGGCGATGCCTGCTTGCCGAATATCA  
TGGTGGAAAATGGCCGCTTTTCTGGATTCATCGACTGTGGCCGGCTGGGTG  
TGCGGACCGCTATCAGGACATAGCGTTGGCTACCCGTGATATTGCTGAAG  
AGCTTGGCGGCGAATGGGCTGACCGCTTCCTCGTGCTTTACGGTATCGCCG  
CTCCCGATTTCGACGCGCATCGCCTTCTATCGCCTTCTTGACGAGTTCTTCTG  
AGCGGGACTCTGGGGTTCGAAATGACCGACCAAGCGACGCCAACCTGCC  
ATCACGAGATTTGATTCCACCGCCGCTTCTATGAAAGGTTGGGCTTCGG  
AATCGTTTTCCGGGACGCCGGCTGGATGATCCTCCAGCGCGGGGATCTCAT  
GCTGGAGTTCTTCGCCACCCCAACTGTTTATTGCAGCTTATAATGGTTAC  
AAATAAAGCAATAGCATCACAAATTCACAAATAAAGCATTTTTTTTCACTGC



ATTCTAGTTGTGGTTTGTCCAAACTCATCAATGTATCTTATCATGTCTGTATA  
CCGTCGACCTCTAGCTAGAGCTTGGCGTAATCATGGTCATAGCTGTTTCCTG  
TGTGAAATTGTTATCCGCTCACAATCCACACAACATACGAGCCGGAAGCA  
TAAAGTGTAAGCCTGGGGTGCCTAATGAGTGAGCTAACTCACATTAATTG  
CGTTGCGCTCACTGCCCCGCTTCCAGTCGGGAAACCTGTCGTGCCAGCTGC  
ATTAATGAATCGGCCAACGCGCGGGGAGAGGCGGTTTGCATATTGGGCGCT  
CTCCGCTTCCTCGCTCACTGACTCGCTGCGCTCGGTTCGTTTCGGCTGCGGC  
GAGCGGTATCAGCTCACTCAAAGGCGGTAATACGGTTATCCACAGAATCAG  
GGGATAACGCAGGAAAGAACATGTGAGCAAAAGGCCAGCAAAAGGCCAG  
GAACCGTAAAAAGGCCGCGTTGCTGGCGTTTTTCCATAGGCTCCGCCCCC  
TGACGAGCATCACAAAATCGACGCTCAAGTCAGAGGTGGCGAAACCCGA  
CAGGACTATAAAGATACCAGGCGTTTCCCCCTGGAAGCTCCCTCGTGCGCT  
CTCCTGTTCCGACCCTGCCGCTTACCGGATACCTGTCCGCCTTCTCCCTTC  
GGGAAGCGTGGCGCTTCTCATAGCTCACGCTGTAGGTATCTCAGTTCGGT  
GTAGGTCGTTTCGCTCCAAGCTGGGCTGTGTGCACGAACCCCCCGTTCAGCC  
CGACCGCTGCGCCTTATCCGGTAACTATCGTCTTGAGTCCAACCCGGTAAG  
ACACGACTTATCGCCACTGGCAGCAGCCACTGGTAACAGGATTAGCAGAG  
CGAGGTATGTAGGCGGTGCTACAGAGTTCTTGAAGTGGTGGCCTAACTACG  
GCTACACTAGAAGAACAGTATTTGGTATCTGCGCTCTGCTGAAGCCAGTTA  
CCTTCGGAAAAAGAGTTGGTAGCTCTTGATCCGGCAAACAAACCACCGCT  
GGTAGCGGTTTTTTTGTGTTGCAAGCAGCAGATTACGCGCAGAAAAAAGG  
ATCTCAAGAAGATCCTTTGATCTTTTCTACGGGGTCTGACGCTCAGTGGAA  
CGAAAACCTACGTAAAGGGATTTTGGTCATGAGATTATCAAAAAGGATCTT  
CACCTAGATCCTTTTAAATTAATAAATGAAGTTTTAAATCAATCTAAAGTATAT  
ATGAGTAAACTTGGTCTGACAGTTACCAATGCTTAATCAGTGAGGCACCTAT  
CTCAGCGATCTGTCTATTTTCGTTTCATCCATAGTTGCCTGACTCCCCGTCGTG  
TAGATAACTACGATACGGGAGGGCTTACCATCTGGCCCCAGTGCTGCAATG  
ATACCGCGAGACCCACGCTCACCGGCTCCAGATTTATCAGCAATAAACCAG  
CCAGCCGGAAGGGCCGAGCGCAGAAGTGGTCCTGCAACTTTATCCGCCTC  
CATCCAGTCTATTAATTGTTGCCGGGAAGCTAGAGTAAGTAGTTCGCCAGTT  
AATAGTTTGCGCAACGTTGTTGCCATTGCTACAGGCATCGTGGTGTACACGC  
TCGTCGTTTGGTATGGCTTCATTCAGCTCCGGTTCCCAACGATCAAGGCGA  
GTTACATGATCCCCATGTTGTGCAAAAAGCGGTTAGCTCCTTCGGTCCTC  
CGATCGTTGTCAGAAGTAAGTTGGCCGCAGTGTTATCACTCATGGTTATGGC  
AGCACTGCATAATTCTCTTACTGTTCATGCCATCCGTAAGATGCTTTTCTGTG  
ACTGGTGAGTACTCAACCAAGTCATTCTGAGAATAGTGTATGCGGCGACCG  
AGTTGCTCTTGCCCGCGTCAATACGGGATAATACCGCGCCACATAGCAGA  
ACTTTAAAAGTGCTCATCATTGGAAAACGTTCTTCGGGGCGAAAACCTCTCA

AGGATCTTACCGCTGTTGAGATCCAGTTCGATGTAACCCACTCGTGACCC  
AACTGATCTTCAGCATCTTTTACTTTCACCAGCGTTTCTGGGTGAGCAAAA  
ACAGGAAGGCAAAATGCCGCAAAAAGGGAATAAGGGCGACACGGAAAT  
GTTGAATACTCATACTCTTCCTTTTTCAATATTATTGAAGCATTATCAGGGT  
TATTGTCTCATGAGCGGATACATATTTGAATGTATTTAGAAAAATAACAAAT  
AGGGGTCCGCGCACATTTCCCCGAAAAGTGCCACCTGACGTC

PCDNA3.1 ERBB2-Nluc

PROMOTER

Nluc

Linker

ERBB2

GACGGATCGGGAGATCTCCCGATCCCCTATGGTGCACTCTCAGTACAATCT  
GCTCTGATGCCGCATAGTTAAGCCAGTATCTGCTCCCTGCTTGTGTGTTGGA  
GGTCGCTGAGTAGTGC GCGAGCAAATTTAAGCTACAACAAGGCAAGGCT  
TGACCGACAATTGCATGAAGAATCTGCTTAGGGTTAGGCGTTTTGCGCTGC  
TTCGCGATGTACGGGCCAGATATACGCGTTGACATTGATTATTGACTAGTTAT  
TAATAGTAATCAATTACGGGGTCATTAGTTCATAGCCCATATATGGAGTTCCG  
CGTTACATAACTTACGGTAAATGGCCCGCCTGGCTGACCGCCCAACGACCC  
CCGCCATTGACGTCAATAATGACGTATGTTCCCATAGTAACGCCAATAGGG  
ACTTTCATTGACGTCAATGGGTGGAGTATTTACGGTAAACTGCCCACTTGG  
CAGTACATCAAGTGTATCATATGCCAAGTACGCCCCCTATTGACGTCAATGA  
CGGTAAATGGCCCGCCTGGCATTATGCCCAGTACATGACCTTATGGGACTTT  
CCTACTTGGCAGTACATCTACGTATTAGTCATCGCTATTACCATGGTGATGCG  
GTTTTGGCAGTACATCAATGGGCGTGGATAGCGGTTTGACTCACGGGGATT  
TCCAAGTCTCCACCCCATGACGTCAATGGGAGTTTGTGTTTGGCACCAAAA  
TCAACGGGACTTTCCAAAATGTCGTAACAACCTCCGCCCCATTGACGCAAAT  
GGGCGGTAGGCGTGTACGGTGGGAGGTCTATATAAGCAGAGCTCTCTGGCT  
AACTAGAGAACCCACTGCTTACTGGCTTATCGAAATTAATACGACTCACTAT  
AGGGAGACCCAAGCTGGCTAGCATGGAAGATGCCAAAACATTAAGAAGG  
GCCAGCGCCATTCTACCCACTCGAAGACGGGACCGCCGGCGAGCAGCTG  
CACAAAGCCATGAAGCGCTACGCCCTGGTGCCCGGCACCATCGCCTTTACC  
GACGCACATATCGAGGTGGACATTACCTACGCCGAGTACTTCGAGATGAGC  
GTTTCGGCTGGCAGAAGCTATGAAGCGCTATGGGCTGAATACAAACCATCGG  
ATCGTGGTGTGCAGCGAGAATAGCTTGCAGTTCTTCATGCCCGTGTTGGGT  
GCCCTGTTCATCGGTGTGGCTGTGGCCCCAGCTAACGACATCTACAACGAG  
CGCGAGCTGCTGAACAGCATGGGCATCAGCCAGCCCACCGTCGTATTCGTG  
AGCAAGAAAGGGCTGCAAAGATCCTCAACGTGCAAAGAAGCTACCGAT  
CATAAAAAGATCATCATCATGGATAGCAAGACCGACTACCAGGGCTTCCA  
AAGCATGTACACCTTCGTGACTTCCCATTTGCCACCCGGCTTCAACGAGTA  
CGACTTCGTGCCCGAGAGCTTCGACCGGGACAAAACCATCGCCCTGATCAT  
GAACAGTAGTGGCAGTACCGGATTGCCCAAGGGCGTAGCCCTACCGCACC  
GCACCGCTTGTGTCCGATTCAGTCATGCCCGCGACCCCATCTTCGGCAACC  
AGATCATCCCCGACACCGCTATCCTCAGCGTGGTGCCATTTCAACACGGCTT  
CGGCATGTTCAACACGCTGGGCTACTTGATCTGCGGCTTTCGGGTCGTGCT

CATGTACCGCTTCGAGGAGGAGCTATTCTTGCGCAGCTTGCAAGACTATAA  
GATTCAATCTGCCCTGCTGGTGCCACACTATTTAGCTTCTTCGCTAAGAGC  
ACTCTCATCGACAAGTACGACCTAAGCAACTTGCACGAGATCGCCAGCGG  
CGGGGCGCCGCTCAGCAAGGAGGTAGGTGAGGCCGTGGCCAAACGCTTCC  
ACCTACCAGGCATCCGCCAGGGCTACGGCCTGACAGAAACAACCAGCGCC  
ATTCTGATCACCCCGAAGGGGACGACAAGCCTGGCGCAGTAGGCAAGGT  
GGTGCCCTTCTTCGAGGCTAAGGTGGTGGACTTGGACACCGGTAAGACAC  
TGGGTGTGAACCAGCGCGGCGAGCTGTGCGTCCGTGGCCCCATGATCATG  
AGCGGCTACGTTAACAACCCCGAGGCTACAAACGCTCTCATCGACAAGGA  
CGGCGGAAGCTTGGTACCGAGCTCGGATCCACTAGTCCAGTGTGGTGGAAAT  
TCTGCAGATATCCAGCACAGTGGCGGGCCGCTCGAGCCATGGAGCTGGCGG  
CCTTGTGCCGCTGGGGGCTCCTCCTCGCCCTCTTGCCCCCGGAGCCGCGA  
GCACCCAAGTGTGCACCGGCACAGACATGAAGCTGCGGCTCCCTGCCAGT  
CCCGAGACCCACCTGGACATGCTCCGCCACCTCTACCAGGGCTGCCAGGT  
GGTGCAGGGAAACCTGGAACCTCACCTACCTGCCACCAATGCCAGCCTGT  
CCTTCCTGCAGGATATCCAGGAGGTGCAGGGCTACGTGCTCATCGCTCACA  
ACCAAGTGAGGCAGGTCCCACTGCAGAGGCTGCGGATTGTGCGAGGCACC  
CAGCTCTTTGAGGACA ACTATGCCCTGGCCGTGCTAGACAATGGAGACCCG  
CTGAACAATACCACCCTGTCACAGGGGCCTCCCCAGGAGGCCTGCGGGA  
GCTGCAGCTTCGAAGCCTCACAGAGATCTTGAAAGGAGGGGTCTTGATCC  
AGCGGAACCCCGAGCTCTGCTACCAGGACACGATTTTGTGGAAGGACATCT  
TCCACAAGAACAACCAGCTGGCTCTCACACTGATAGACACCAACCGCTCT  
CGGGCCTGCCACCCCTGTTCTCCGATGTGTAAGGGCTCCCGCTGCTGGGGA  
GAGAGTTCTGAGGATTGTCAGAGCCTGACGCGCACTGTCTGTGCCGGTGG  
CTGTGCCCGCTGCAAGGGGGCCACTGCCACTGACTGCTGCCATGAGCAGT  
GTGCTGCCGGCTGCACGGGGCCCAAGCACTCTGACTGCCTGGCCTGCCTC  
CACTTCAACCACAGTGGCATCTGTGAGCTGCACTGCCAGCCCTGGTCACC  
TACAACACAGACACGTTTGAGTCCATGCCCAATCCCGAGGGCCGGTATACA  
TTCGGCGCCAGCTGTGTGACTGCCTGTCCCTACA ACTACCTTTCTACGGAC  
GTGGGATCCTGCACCCTCGTCTGCCCCCTGCACAACCAAGAGGTGACAGC  
AGAGGATGGAACACAGCGGTGTGAGAAGTGCAGCAAGCCCTGTGCCCCGA  
GTGTGCTATGGTCTGGGCATGGAGCACTTGCAGAGAGGTGAGGGCAGTTAC  
CAGTGCCAATATCCAGGAGTTTGCTGGCTGCAAGAAGATCTTTGGGAGCCT  
GGCATTCTGCCGGAGAGCTTTGATGGGGACCCAGCCTCCAACACTGCCCC  
GCTCCAGCCAGAGCAGCTCCAAGTGTTTGAGACTCTGGAAGAGATCACAG  
GTTACCTATACATCTCAGCATGGCCGGACAGCCTGCCTGACCTCAGCGTCTT  
CCAGAACCTGCAAGTAATCCGGGGACGAATTCTGCACAATGGCGCCTACTC  
GCTGACCCTGCAAGGGCTGGGCATCAGCTGGCTGGGGCTGCGCTCACTGA

GGGAACTGGGCAGTGGACTGGCCCTCATCCACCATAACACCCACCTCTGCT  
TCGTGCACACGGTGCCCTGGGACCAGCTCTTTCGGAACCCGCACCAAGCT  
CTGCTCCACACTGCCAACCGGCCAGAGGACGAGTGTGTGGGCGAGGGCCT  
GGCCTGCCACCAGCTGTGCGCCCGAGGGCACTGCTGGGGTCCAGGGCCCA  
CCCAGTGTGTCAACTGCAGCCAGTTCCTTCGGGGCCAGGAGTGCCTGGAG  
GAATGCCGAGTACTGCAGGGGCTCCCCAGGGAGTATGTGAATGCCAGGCA  
CTGTTTGCCGTGCCACCCTGAGTGTGAGCCCCAGAATGGCTCAGTGACCTG  
TTTTGGACCGGAGGCTGACCAGTGTGTGGCCTGTGCCCACTATAAGGACCC  
TCCCTTCTGCGTGGCCCGCTGCCCCAGCGGTGTGAAACCTGACCTCTCCTA  
CATGCCCATCTGGAAGTTTCCAGATGAGGAGGGCGCATGCCAGCCTTGCCC  
CATCAACTGCACCCACTCCTGTGTGGACCTGGATGACAAGGGCTGCCCCGC  
CGAGCAGAGAGCCAGCCCTCTGACGTCCATCATCTCTGCGGTGGTTGGCAT  
TCTGCTGGTCGTGGTCTTGGGGGTGGTCTTTGGGATCCTCATCAAGCGACG  
GCAGCAGAAGATCCGGAAGTACACGATGCGGAGACTGCTGCAGGAAACG  
GAGCTGGTGGAGCCGCTGACACCTAGCGGAGCGATGCCCAACCAGGCGCA  
GATGCGGATCCTGAAAGAGACGGAGCTGAGGAAGGTGAAGGTGCTTGGAT  
CTGGCGCTTTTGGCACAGTCTACAAGGGCATCTGGATCCCTGATGGGGAGA  
ATGTGAAAATTCCAGTGGCCATCAAAGTGTTGAGGGAAAACACATCCCC  
AAAGCCAACAAAGAAATCTTAGACGAAGCATAACGTGATGGCTGGTGTGGG  
CTCCCCATATGTCTCCCGCCTTCTGGGCATCTGCCTGACATCCACGGTGCAG  
CTGGTGACACAGCTTATGCCCTATGGCTGCCTCTTAGACCATGTCCGGGAA  
AACCGCGGACGCCTGGGCTCCCAGGACCTGCTGAACTGGTGTATGCAGATT  
GCCAAGGGGATGAGCTACCTGGAGGATGTGCGGCTCGTACACAGGGACTT  
GGCCGCTCGGAACGTGCTGGTCAAGAGTCCCAACCATGTCAA AATTACAG  
ACTTCGGGCTGGCTCGGCTGCTGGACATTGACGAGACAGAGTACCATGCA  
GATGGGGGCAAGGTGCCATCAAGTGGATGGCGCTGGAGTCCATTCTCCGC  
CGGCGGTTACCCACCAGAGTGATGTGTGGAGTTATGGTGTGACTGTGTGG  
GAGCTGATGACTTTTGGGGCCAAACCTTACGATGGGATCCCAGCCCGGGAG  
ATCCCTGACCTGCTGGAAAAGGGGGAGCGGCTGCCCCAGCCCCCATCTG  
CACCATTGATGTCTACATGATCATGGTCAAATGTTGGATGATTGACTCTGAA  
TGTCGGCCAAGATTCCGGGAGTTGGTGTCTGAATTCTCCCGCATGGCCAGG  
GACCCCCAGCGCTTTGTGGTCATCCAGAATGAGGACTTGGGCCCAGCCAG  
TCCCTTGGACAGCACCTTCTACCGCTCACTGCTGGAGGACGATGACATGGG  
GGACCTGGTGGATGCTGAGGAGTATCTGGTACCCAGCAGGGCTTCTTCTG  
TCCAGACCCTGCCCCGGGCGCTGGGGGCATGGTCCACCACAGGCACCGCA  
GCTCATCTACCAGGAGTGGCGGTGGGGACCTGACACTAGGGCTGGAGCCC  
TCTGAAGAGGAGGCCCCCAGGTCTCCACTGGCACCTCCGAAGGGGCTGG  
CTCCGATGTATTTGATGGTGACCTGGGAATGGGGGCAGCCAAGGGGCTGCA

AAGCCTCCCCACACATGACCCCAGCCCTCTACAGCGGTACAGTGAGGACC  
CCACAGTACCCCTGCCCTCTGAGACTGATGGCTACGTTGCCCCCCTGACCT  
GCAGCCCCCAGCCTGAATATGTGAACCAGCCAGATGTTTCGGCCCCAGCCCC  
CTTCGCCCCGAGAGGGCCCTCTGCCTGCTGCCCGACCTGCTGGTGCCACTC  
TGGAAGGGCCCAAGACTCTCTCCCCAGGGAAGAATGGGGTTCGTCAAAGAC  
GTTTTTGCCTTTGGGGGTGCCGTGGAGAACCCCGAGTACTTGACACCCAG  
GGAGGAGCTGCCCTCAGCCCCACCCTCCTCCTGCCTTCAGCCCAGCCTTC  
GACAACTCTATTACTGGGACCAGGACCCACCAGAGCGGGGGGCTCCACC  
CAGCACCTTCAAAGGGACACCTACGGCAGAGAACCCAGAGTACCTGGGTC  
TGGACGTGCCAGTGTGATCTAGAGGGCCCGTTTAAACCCGCTGATCAGCCT  
CGACTGTGCCTTCTAGTTGCCAGCCATCTGTTGTTTGCCCCTCCCCCGTGCC  
TTCCTTGACCCTGGAAGGTGCCACTCCCCTGTCCTTTCCTAATAAAATGA  
GGAAATTGCATCGCATTGTCTGAGTAGGTGTCATTCTATTCTGGGGGGTGGG  
GTGGGGCAGGACAGCAAGGGGGAGGATTGGGAAGACAATAGCAGGCATG  
CTGGGGATGCGGTGGGCTCTATGGCTTCTGAGGCGGAAAGAACCAGCTGG  
GGCTCTAGGGGGTATCCCCACGCGCCCTGTAGCGGCGCATTAAGCGCGGCG  
GGTGTGGTGGTTACGCGCAGCGTGACCGCTACACTTGCCAGCGCCCTAGCG  
CCCGCTCCTTTCGCTTTCCTTCCCTTCTTCTCGCCACGTTTCGCCGGCTTTC  
CCCGTCAAGCTCTAAATCGGGGGCTCCCTTTAGGGTTCGATTTAGTGCTTT  
ACGGCACCTCGACCCCAAAAACTTGATTAGGGTGATGGTTCACGTAGTGG  
GCCATCGCCCTGATAGACGGTTTTTCGCCCTTTGACGTTGGAGTCCACGTTTC  
TTAATAGTGGACTCTTGTTCCAAACTGGAACAACACTCAACCCTATCTCG  
GTCTATTCTTTTGATTTATAAGGGATTTTGCCGATTTTCGGCCTATTGGTTAAA  
AAATGAGCTGATTTAACAAAAATTTAACGCGAATTAATTCTGTGGAATGTGT  
GTCAGTTAGGGTGTGGAAAGTCCCCAGGCTCCCCAGCAGGCAGAAGTATG  
CAAAGCATGCATCTCAATTAGTCAGCAACCAGGTGTGGAAAGTCCCCAGG  
CTCCCCAGCAGGCAGAAGTATGCAAAGCATGCATCTCAATTAGTCAGCAAC  
CATAGTCCCGCCCCCTAACTCCGCCCATCCCGCCCCCTAACTCCGCCCAGTTCC  
GCCATTCTCCGCCCCATGGCTGACTAATTTTTTTTATTTATGCAGAGGCCG  
AGGCCGCTCTGCCTCTGAGCTATTCCAGAAGTAGTGAGGAGGCTTTTTTTG  
GAGGCCTAGGCTTTTGCAAAAAGCTCCCGGGAGCTTGTATATCCATTTTCG  
GATCTGATCAAGAGACAGGATGAGGATCGTTTCGCATGATTGAACAAGATG  
GATTGCACGCAGGTTCTCCGGCCGCTTGGGTGGAGAGGCTATTCGGCTATG  
ACTGGGCACAACAGACAATCGGCTGCTCTGATGCCGCCGTGTTCCGGCTGT  
CAGCGCAGGGGGCGCCCGTTCTTTTTGTCAAGACCGACCTGTCCGGTGCC  
CTGAATGAACTGCAGGACGAGGCAGCGCGGCTATCGTGGCTGGCCACGAC  
GGGCGTTCCTTGCAGCTGTGCTCGACGTTGTCACTGAAGCGGGAAGGG  
ACTGGCTGCTATTGGGCGAAGTGCCGGGGCAGGATCTCCTGTCATCTCACC

TTGCTCCTGCCGAGAAAGTATCCATCATGGCTGATGCAATGCGGGCGGCTGC  
ATACGCTTGATCCGGCTACCTGCCATTCGACCACCAAGCGAAACATCGCA  
TCGAGCGAGCACGTACTIONCGGATGGAAGCCGGTCTTGTGATCAGGATGATC  
TGGACGAAGAGCATCAGGGGCTCGCGCCAGCCGAACTGTTCCGCCAGGCTC  
AAGGCGCGCATGCCCCGACGGCGAGGATCTCGTCGTGACCCATGGCGATGC  
CTGCTTGCCGAATATCATGGTGGAAAATGGCCGCTTTTCTGGATTCATCGAC  
TGTGGCCGGCTGGGTGTGGCGGACCGCTATCAGGACATAGCGTTGGCTACC  
CGTGATATTGCTGAAGAGCTTGGCGGGCAATGGGCTGACCGCTTCCTCGTG  
CTTTACGGTATCGCCGCTCCCGATTCGCAGCGCATCGCCTTCTATCGCCTTC  
TTGACGAGTTCTTCTGAGCGGGACTCTGGGGTTCGAAATGACCGACCAAG  
CGACGCCCAACCTGCCATCACGAGATTCGATTCCACCGCCGCCTTCTATG  
AAAGGTTGGGCTTCGGAATCGTTTTCCGGGACGCCGGCTGGATGATCCTCC  
AGCGCGGGGATCTCATGCTGGAGTTCTTCGCCACCCCAACTTGTTTATTGC  
AGCTTATAATGGTTACAAATAAAGCAATAGCATCACAAATTCACAAATAAA  
GCATTTTTTTCACTGCATTCTAGTTGTGGTTTGTCCAAACTCATCAATGTATC  
TTATCATGTCTGTATACCGTCGACCTCTAGCTAGAGCTTGCGGTAATCATGGT  
CATAGCTGTTTCTGTGTGAAATTGTTATCCGCTCACAAATCCACACAACAT  
ACGAGCCGGAAGCATAAAGTGTAAGCCTGGGGTGCCTAATGAGTGAGCT  
AACTCACATTAATTGCGTTGCGCTCACTGCCCGCTTTCAGTCGGGAAACC  
TGTCGTGCCAGCTGCATTAATGAATCGGCCAACGCGCGGGGAGAGGCGGT  
TTGCGTATTGGGCGCTCTTCCGCTTCTCGCTCACTGACTCGCTGCGCTCGG  
TCGTTCCGGCTGCGGGGAGCGGTATCAGCTCACTCAAAGGCGGTAATACGGT  
TATCCACAGAATCAGGGGATAACGCAGGAAAGAACATGTGAGCAAAAGGC  
CAGCAAAAGGCCAGGAACCGTAAAAAGGCCGCGTTGCTGGCGTTTTTCCA  
TAGGCTCCGCCCCCTGACGAGCATCACAAAATCGACGCTCAAGTCAGA  
GGTGGCGAAACCCGACAGGACTATAAAGATAACCAGGCGTTTCCCCCTGGA  
AGCTCCCTCGTGCGCTCTCCTGTTCCGACCCTGCCGCTTACCGGATACCTGT  
CCGCCTTTCTCCCTTCGGGAAGCGTGGCGCTTTCTCATAGCTCACGCTGTA  
GGTATCTCAGTTCGGTGTAGGTCGTTCCGCTCCAAGCTGGGCTGTGTGCACG  
AACCCCCGTTACGCCGACCGCTGCGCCTTATCCGGTAACTATCGTCTTGA  
GTCCAACCCGGTAAGACACGACTTATCGCCACTGGCAGCAGCCACTGGTA  
ACAGGATTAGCAGAGCGAGGTATGTAGGCGGTGCTACAGAGTTCTTGAAGT  
GGTGGCCTAACTACGGCTACACTAGAAGAACAGTATTTGGTATCTGCGCTC  
TGCTGAAGCCAGTTACCTTCGGAAAAAGAGTTGGTAGCTCTTGATCCGGCA  
AACAAACCACCGCTGGTAGCGTTTTTTTTGTTTGCAAGCAGCAGATTACGC  
GCAGAAAAAAAGGATCTCAAGAAGATCCTTTGATCTTTTCTACGGGGTCTG  
ACGCTCAGTGGAACGAAAACCTACGTTAAGGGATTTTGGTCATGAGATTAT  
CAAAAAGGATCTTACCTAGATCCTTTTAAATAAAAATGAAGTTTTAAATC

AATCTAAAGTATATATGAGTAAACTTGGTCTGACAGTTACCAATGCTTAATC  
AGTGAGGCACCTATCTCAGCGATCTGTCTATTTTCGTTTCATCCATAGTTGCCT  
GACTCCCCGTTCGTGTAGATAACTACGATACGGGAGGGCTTACCATCTGGCC  
CCAGTGCTGCAATGATACCGCGAGACCCACGCTCACCGGCTCCAGATTTAT  
CAGCAATAAACCAGCCAGCCGGAAGGGCCGAGCGCAGAAGTGGTCCTGC  
AACTTTATCCGCCTCCATCCAGTCTATTAATTGTTGCCGGGAAGCTAGAGTA  
AGTAGTTCGCCAGTTAATAGTTTTCGCAACGTTGTTGCCATTGCTACAGGC  
ATCGTGGTGTACGCTCGTCTTTGGTATGGCTTCATTCAGCTCCGGTTCCC  
AACGATCAAGGCGAGTTACATGATCCCCATGTTGTGCAAAAAGCGGTTA  
GCTCCTTCGGTCTCCGATCGTTGTCAGAAGTAAGTTGGCCGCAGTGTTAT  
CACTCATGGTTATGGCAGCACTGCATAATTCTTACTGTCATGCCATCCGTA  
AGATGCTTTTCTGTGACTGGTGAGTACTCAACCAAGTCATTCTGAGAATAG  
TGTATGCGGCGACCGAGTTGCTCTTGCCCCGGCGTCAATACGGGATAATACC  
GCGCCACATAGCAGAACTTTAAAAGTGCTCATCATTGGAAAACGTTCTTCG  
GGCGAAAACCTCTCAAGGATCTTACCGCTGTTGAGATCCAGTTCGATGTAA  
CCCCTCGTGCACCCAAGTATCTTCAGCATCTTTTACTTTCACCAGCGTTT  
CTGGGTGAGCAAAAACAGGAAGGCAAAATGCCGCAAAAAGGGAATAAG  
GGCGACACGGAAATGTTGAATACTCATACTCTTCCTTTTTCAATATTATTGA  
AGCATTATCAGGGTTATTGTCTCATGAGCGGATACATATTTGAATGTATTTA  
GAAAATAAACAATAGGGGTTCCGCGCACATTTCCCCGAAAAGTGCCAC  
CTGACGTC



PcDNA3.1 Luc

PROMOTER

Luc

GACGGATCGGGAGATCTCCCGATCCCCTATGGTGCACTCTCAGTACAATCT  
GCTCTGATGCCGCATAGTTAAGCCAGTATCTGCTCCCTGCTTGTGTGTTGGA  
GGTCGCTGAGTAGTGC GCGAGCAA AATTTAAGCTACAACAAGGCAAGGCT  
TGACCGACAATTGCATGAAGAATCTGCTTAGGGTTAGGCGTTTTGCGCTGC  
TTCGCGATGTACGGGCCAGATATACGCGTTGACATTGATTATTGACTAGTTAT  
TAATAGTAATCAATTACGGGGTCATTAGTTCATAGCCCATATATGGAGTTCCG  
CGTTACATAACTTACGGTAAATGGCCCGCCTGGCTGACCGCCCAACGACCC  
CCGCCATTGACGTCAATAATGACGTATGTTCCCATAGTAACGCCAATAGGG  
ACTTTCATTGACGTCAATGGGTGGAGTATTTACGGTAAACTGCCCACTTGG  
CAGTACATCAAGTGTATCATATGCCAAGTACGCCCCCTATTGACGTCAATGA  
CGGTAAATGGCCCGCCTGGCATTATGCCCAGTACATGACCTTATGGGACTTT  
CCTACTTGGCAGTACATCTACGTATTAGTCATCGCTATTACCATGGTGATGCG  
GTTTTGGCAGTACATCAATGGGCGTGGATAGCGGTTTGACTCACGGGGATT  
TCCAAGTCTCCACCCCATGACGTCAATGGGAGTTTGTTTTGGCACCAAAA  
TCAACGGGACTTTCCAAAATGTCGTAACA ACTCCGCCCCATTGACGCAAAT  
GGGCGGTAGGCGTGTACGGTGGGAGGTCTATATAAGCAGAGCTCTCTGGCT  
AACTAGAGAACCCACTGCTTACTGGCTTATCGAAATTAATACGACTCACTAT  
AGGGAGACCCAAGCTGGCTAGCATGGAAGATGCCAAAACATTAAGAAGG  
GCCCAGCGCCATTCTACCCACTCGAAGACGGGACCGCCGGCGAGCAGCTG  
CACAAAGCCATGAAGCGCTACGCCCTGGTGCCCGGCACCATCGCCTTTACC  
GACGCACATATCGAGGTGGACATTACCTACGCCGAGTACTTCGAGATGAGC  
GTTTCGGCTGGCAGAAGCTATGAAGCGCTATGGGCTGAATACAAACCATCGG  
ATCGTGGTGTGCAGCGAGAATAGCTTGCAGTTCTTCATGCCCGTGTTGGGT  
GCCCTGTTTCATCGGTGTGGCTGTGGCCCCAGCTAACGACATCTACAACGAG  
CGCGAGCTGCTGAACAGCATGGGCATCAGCCAGCCCACCGTCGTATTCGTG  
AGCAAGAAAGGGCTGCAAAGATCCTCAACGTGCAAAGAAGCTACCGAT  
CATAAAAAGATCATCATCATGGATAGCAAGACCGACTACCAGGGCTTCCA  
AAGCATGTACACCTTCGTGACTTCCCATTTGCCACCCGGCTTCAACGAGTA  
CGACTTCGTGCCCGAGAGCTTCGACCGGGACAAAACCATCGCCCTGATCAT  
GAACAGTAGTGGCAGTACCGGATTGCCCAAGGGCGTAGCCCTACCGCACC  
GCACCGCTTGTGTCCGATTCAGTCATGCCCGCGACCCCATCTTCGGCAACC  
AGATCATCCCCGACACCGCTATCCTCAGCGTGGTGCCATTTCAACACGGCTT  
CGGCATGTTCAACACGCTGGGCTACTTGATCTGCGGCTTTCGGGTCGTGCT  
CATGTACCGCTTCGAGGAGGAGCTATTCTTGCGCAGCTTGCAAGACTATAA  
GATTCAATCTGCCCTGCTGGTGCCCACTATTTAGCTTCTTCGCTAAGAGC

ACTCTCATCGACAAGTACGACCTAAGCAACTTGCACGAGATCGCCAGCGG  
CGGGGCGCCGCTCAGCAAGGAGGTAGGTGAGGCCGTGGCCAAACGCTTCC  
ACCTACCAGGCATCCGCCAGGGCTACGGCCTGACAGAAACAACCAGCGCC  
ATTCTGATCACCCCCGAAGGGGACGACAAGCCTGGCGCAGTAGGCAAGGT  
GGTGCCCTTCTTCGAGGCTAAGGTGGTGGACTTGGACACCGGTAAGACAC  
TGGGTGTGAACCAGCGCGGCGAGCTGTGCGTCCGTGGCCCCATGATCATG  
AGCGGCTACGTTAACAACCCCGAGGCTACAAACGCTCTCATCGACAAGGA  
CGGCTGGCTGCACAGCGGCGACATCGCCTACTGGGACGAGGACGAGCACT  
TCTTCATCGTGGACCGGCTGAAGAGCCTGATCAAATACAAGGGCTACCAGG  
TAGCCCCAGCCGAAGTGGAGAGCATCCTGCTGCAACACCCCAACATCTTCG  
ACGCCGGGGTTCGCCGGCCTGCCCCGACGACGATGCCGGCGAGCTGCCCGCC  
GCAGTCGTCGTGCTGGAACACGGTAAAACCATGACCGAGAAGGAGATCGT  
GGACTATGTGGCCAGCCAGGTTACAACCGCCAAGAAGCTGCGCGGTGGTG  
TTGTGTTTCGTGGACGAGGTGCCTAAAGGACTGACCGGCAAGTTGGACGCC  
CGCAAGATCCGCGAGATTCTCATTAAGGCCAAGAAGGGCGGCAAGATCGC  
CGTGGCAAGCTTGGTACCGAGCTCGGATCCACTAGTCCAGTGTGGTGAAT  
TCTGCAGATATCCAGCACAGTGGCGGCCGCTCGAGTCTAGAGGGCCCGTTT  
AAACCCGCTGATCAGCCTCGACTGTGCCTTCTAGTTGCCAGCCATCTGTTG  
TTTGCCCTCCCCCGTGCCTTCCCTTGACCCTGGAAGGTGCCACTCCCCTG  
TCCTTTCCTAATAAAATGAGGAAATTGCATCGCATTGTCTGAGTAGGTGTCA  
TTCTATTCTGGGGGGTGGGGTGGGGCAGGACAGCAAGGGGGAGGATTGGG  
AAGACAATAGCAGGCATGCTGGGGATGCGGTGGGCTCTATGGCTTCTGAGG  
CGGAAAGAACCAGCTGGGGCTCTAGGGGGTATCCCCACGCGCCCTGTAGC  
GGCGCATTAAAGCGCGGGCGGGTGTGGTGGTTACGCGCAGCGTGACCGCTAC  
ACTTGCCAGCGCCCTAGCGCCCGCTCCTTTCGCTTTCTTCCCTTCTTTCTC  
GCCACGTTGCGCGGCTTTCCCCGTCAAGCTCTAAATCGGGGGCTCCCTTAA  
GGGTTCGATTTAGTGCTTTACGGCACCTCGACCCCAAAAACTTGATTAG  
GGTGATGGTTCACGTAGTGGGCCATCGCCCTGATAGACGGTTTTTCGCCCTT  
TGACGTTGGAGTCCACGTTCTTTAATAGTGGACTCTTGTTCCAAACTGGAA  
CAACACTCAACCCTATCTCGGTCTATTCTTTTGATTTATAAGGGATTTTGCCG  
ATTCGGCCTATTGGTTAAAAAATGAGCTGATTTAACAAAAATTTAACGCGA  
ATTAATTCTGTGGAATGTGTGTCAGTTAGGGTGTGGAAAGTCCCCAGGCTC  
CCCAGCAGGCAGAAGTATGCAAAGCATGCATCTCAATTAGTCAGCAACCAG  
GTGTGGAAAGTCCCCAGGCTCCCCAGCAGGCAGAAGTATGCAAAGCATGC  
ATCTCAATTAGTCAGCAACCATAGTCCCGCCCCTAACTCCGCCCATCCCGCC  
CCTAACTCCGCCAGTTCCGCCATTCTCCGCCCATGGCTGACTAATTTTT  
TTTATTTATGCAGAGGCCGAGGCCGCTCTGCCTCTGAGCTATTCAGAAGT  
AGTGAGGAGGCTTTTTTGGAGGCCTAGGCTTTTGCAAAAAGCTCCCGGGA

GCTTGTATATCCATTTTCGGATCTGATCAAGAGACAGGATGAGGATCGTTTC  
GCATGATTGAACAAGATGGATTGCACGCAGGTTCTCCGGCCGCTTGGGTGG  
AGAGGCTATTCGGCTATGACTGGGCACAACAGACAATCGGCTGCTCTGATG  
CCGCCGTGTTCCGGCTGTCAGCGCAGGGGCGCCCGGTTCTTTTTGTCAAGA  
CCGACCTGTCCGGTGCCCTGAATGAACTGCAGGACGAGGCAGCGCGGCTA  
TCGTGGCTGGCCACGACGGGCGTTCCTTGCGCAGCTGTGCTCGACGTTGTC  
ACTGAAGCGGGAAGGGACTGGCTGCTATTGGGCGAAGTGCCGGGGCAGG  
ATCTCCTGTACATCTCACCTTGCTCCTGCCGAGAAAGTATCCATCATGGCTGA  
TGCAATGCGGCGGCTGCATACGCTTGATCCGGCTACCTGCCATTCGACCA  
CCAAGCGAAACATCGCATCGAGCGAGCACGTACTIONCGGATGGAAGCCGGTC  
TTGTCGATCAGGATGATCTGGACGAAGAGCATCAGGGGCTCGCGCCAGCC  
GAACTGTTCCGCCAGGCTCAAGGCGCGCATGCCCGACGGCGAGGATCTCGT  
CGTGACCCATGGCGATGCCTGCTTGCCGAATATCATGGTGGAAAATGGCCG  
CTTTTCTGGATTCATCGACTGTGGCCGGCTGGGTGTGGCGGACCGCTATCA  
GGACATAGCGTTGGCTACCCGTGATATTGCTGAAGAGCTTGGCGGCGAATG  
GGCTGACCGCTTCCCTCGTGCTTTACGGTATCGCCGCTCCCGATTTCGCAGCG  
CATCGCCTTCTATCGCCTTCTTGACGAGTTCTTCTGAGCGGGACTCTGGGGT  
TCGAAATGACCGACCAAGCGACGCCCAACCTGCCATCACGAGATTCGATT  
CCACCGCCGCTTCTATGAAAGGTTGGGCTTCGGAATCGTTTTCCGGGACG  
CCGGCTGGATGATCCTCCAGCGCGGGGATCTCATGCTGGAGTTCTTCGCCC  
ACCCCAACTTGTTTATTGCAGCTTATAATGGTTACAAATAAAGCAATAGCAT  
CACAAATTCACAAATAAAGCATTTTTTTCACTGCATTCTAGTTGTGGTTTG  
TCCAAACTCATCAATGTATCTTATCATGTCTGTATAACCGTCGACCTCTAGCTA  
GAGCTTGGCGTAATCATGGTCATAGCTGTTTCCTGTGTGAAATTGTTATCCG  
CTCACAAATTCACACAACATACGAGCCGGAAGCATAAAGTGTAAGCCTGG  
GGTGCCATAATGAGTGAGCTAACTCACATTAATTGCGTTGCGCTCACTGCCC  
GCTTTCAGTCGGGAAACCTGTGCTGCCAGCTGCATTAATGAATCGGCCAA  
CGCGCGGGGAGAGGCGGTTTGCGTATTGGGCGCTCTTCCGCTTCCCTCGCTC  
ACTGACTCGCTGCGCTCGGTCGTTCCGGCTGCGGCGAGCGGTATCAGCTCAC  
TCAAAGGCGGTAATACGGTTATCCACAGAATCAGGGGATAACGCAGGAAA  
GAACATGTGAGCAAAAGGCCAGCAAAAGGCCAGGAACCGTAAAAAGGCC  
GCGTTGCTGGCGTTTTTCCATAGGCTCCGCCCCCTGACGAGCATCACAAA  
AATCGACGCTCAAGTCAGAGGTGGCGAAACCCGACAGGACTATAAAGATA  
CCAGGCGTTTCCCCCTGGAAGCTCCCTCGTGCGCTCTCCTGTTCCGACCCT  
GCCGCTTACCGGATACCTGTCCGCTTTTCTCCCTTCGGGAAGCGTGGCGCT  
TTCTCATAGCTCACGCTGTAGGTATCTCAGTTCGGTGTAGGTGCTTCGCTCC  
AAGCTGGGCTGTGTGCACGAACCCCCGTTTCAGCCCGACCGCTGCGCCTT  
ATCCGGTAACTATCGTCTTGAGTCCAACCCGGTAAGACACGACTTATCGCC

ACTGGCAGCAGCCACTGGTAAACAGGATTAGCAGAGCGAGGTATGTAGGCG  
GTGCTACAGAGTTCTTGAAGTGGTGGCCTAACTACGGCTACACTAGAAGAA  
CAGTATTTGGTATCTGCGCTCTGCTGAAGCCAGTTACCTTCGGAAAAAGAG  
TTGGTAGCTCTTGATCCGGCAAACAACCACCGCTGGTAGCGGTTTTTTTG  
TTTGCAAGCAGCAGATTACGCGCAGAAAAAAGGATCTCAAGAAGATCCT  
TTGATCTTTTCTACGGGGTCTGACGCTCAGTGGAACGAAAACCTCACGTTAA  
GGGATTTTGGTCATGAGATTATCAAAAAGGATCTTCACCTAGATCCTTTTAA  
ATTAAAAATGAAGTTTTAAATCAATCTAAAGTATATATGAGTAAACTTGGTCT  
GACAGTTACCAATGCTTAATCAGTGAGGCACCTATCTCAGCGATCTGTCTAT  
TTCGTTTCATCCATAGTTGCCTGACTCCCCGTCGTGTAGATAACTACGATACG  
GGAGGGCTTACCATCTGGCCCCAGTGCTGCAATGATACCGCGAGACCCACG  
CTCACCGGCTCCAGATTTATCAGCAATAAACAGCCAGCCGGAAGGGCCG  
AGCGCAGAAGTGGTCCTGCAACTTTATCCGCCTCCATCCAGTCTATTAATTG  
TTGCCGGGAAGCTAGAGTAAGTAGTTCGCCAGTTAATAGTTTGCGCAACGT  
TGTTGCCATTGCTACAGGCATCGTGGTGTACGCTCGTCGTTTGGTATGGCT  
TCATTCAGCTCCGGTTCCCAACGATCAAGGCGAGTTACATGATCCCCATGT  
TGTGCAAAAAGCGGTTAGCTCCTTCGGTCCCTCCGATCGTTGTCAGAAGTA  
AGTTGGCCGCAGTGTTATCACTCATGGTTATGGCAGCACTGCATAATTCTCT  
TACTGTCATGCCATCCGTAAGATGCTTTTTCTGTGACTGGTGAGTACTCAACC  
AAGTCATTCTGAGAATAGTGTATGCGGCGACCGAGTTGCTCTTGCCCGGCG  
TCAATACGGGATAATACCGCGCCACATAGCAGAACTTTAAAAGTGCTCATC  
ATTGAAAACGTTCTTCGGGGCGAAAACCTCTCAAGGATCTTACCGCTGTTG  
AGATCCAGTTCGATGTAACCCACTCGTGCACCCAACCTGATCTTCAGCATCTT  
TACTTTTACCAGCGTTTCTGGGTGAGCAAAAACAGGAAGGCAAAATGCC  
GCAAAAAGGGAATAAGGGCGACACGGAAATGTTGAATACTCATACTCTTC  
CTTTTTCAATATTATTGAAGCATTATCAGGGTTATTGTCTCATGAGCGGATA  
CATATTTGAATGTATTTAGAAAAATAACAATAGGGGTTCCGCGCACATTT  
CCCCGAAAAGTGCCACCTGACGTC
